# Supplementary material for: Continuous flow synthesis of PCN-222 (MOF-545) with controlled size and morphology: a sustainable approach for efficient production
Source: Royal Society of Chemistry journal article supplement (doi:10.1039/d3gc02774k), 2023-01-01

## Electronic Supplementary Information (ESI)

# Continuous Flow Synthesis of PCN-222 (MOF-545) with Controlled Size and Morphology: A Sustainable Approach for Efficient Production

Alessio Zuliani,<sup>a\*</sup> M. Carmen Castillejos, Nouredine Khier,<sup>a\*</sup>

<sup>a</sup> Asymmetric Synthesis and Nanosystem Group (Art&Fun), Institute for Chemical Research (IIQ), CSIC-University of Seville, 41092 Sevilla, Spain

\*Corresponding authors:

[a.zuliani@csic.es](mailto:a.zuliani@csic.es)

[khier@iiq.csic.es](mailto:khier@iiq.csic.es)

### Table of contents

|                                                                                                                                                                                                                               |    |
|-------------------------------------------------------------------------------------------------------------------------------------------------------------------------------------------------------------------------------|----|
| S1. Details of the c.f. system .....                                                                                                                                                                                          | 2  |
| S2. Materials and methods.....                                                                                                                                                                                                | 3  |
| Materials .....                                                                                                                                                                                                               | 3  |
| Characterization .....                                                                                                                                                                                                        | 3  |
| Details of the synthesis of the thio-N-acetylgalactosamine-PEG-sulfate ligand (S-GalNAc-PEG-sulfate) .....                                                                                                                    | 4  |
| FTIR analysis of Zr nodes .....                                                                                                                                                                                               | 7  |
| S3. Preliminary tests for batch optimization .....                                                                                                                                                                            | 8  |
| S4. Relevant publications related to the c.f. synthesis of MOFs .....                                                                                                                                                         | 10 |
| S5. Calculation of Re, De and residence time ( $\tau$ ) .....                                                                                                                                                                 | 11 |
| S6. Details of the effect of the concentration of the reagents, the volumetric flow rate, the amount of employed acid modulator, and the temperature of the reactions on the STY and on the size-distribution of PCN-222..... | 12 |
| Concentration of the reagents (volume of solvent).....                                                                                                                                                                        | 12 |
| Flow rate .....                                                                                                                                                                                                               | 14 |
| Acid modulator .....                                                                                                                                                                                                          | 16 |
| Temperature .....                                                                                                                                                                                                             | 18 |
| S7. Residence time distribution and pulse experiment.....                                                                                                                                                                     | 20 |
| S8. US-assisted techniques .....                                                                                                                                                                                              | 23 |
| S9. DLS analysis of the samples PCN-222(0%US) and PCN-222(60%US) .....                                                                                                                                                        | 25 |
| S10. Green approach of the c.f. synthesis .....                                                                                                                                                                               | 26 |
| S11. Functionalization with S-GalNAc-PEG-sulfate ligand .....                                                                                                                                                                 | 31 |
| S12. References .....                                                                                                                                                                                                         | 32 |
| S13. Annex: <sup>1</sup> H-NMR and <sup>13</sup> C-NMR spectra .....                                                                                                                                                          | 33 |

S1. Details of the c.f. system

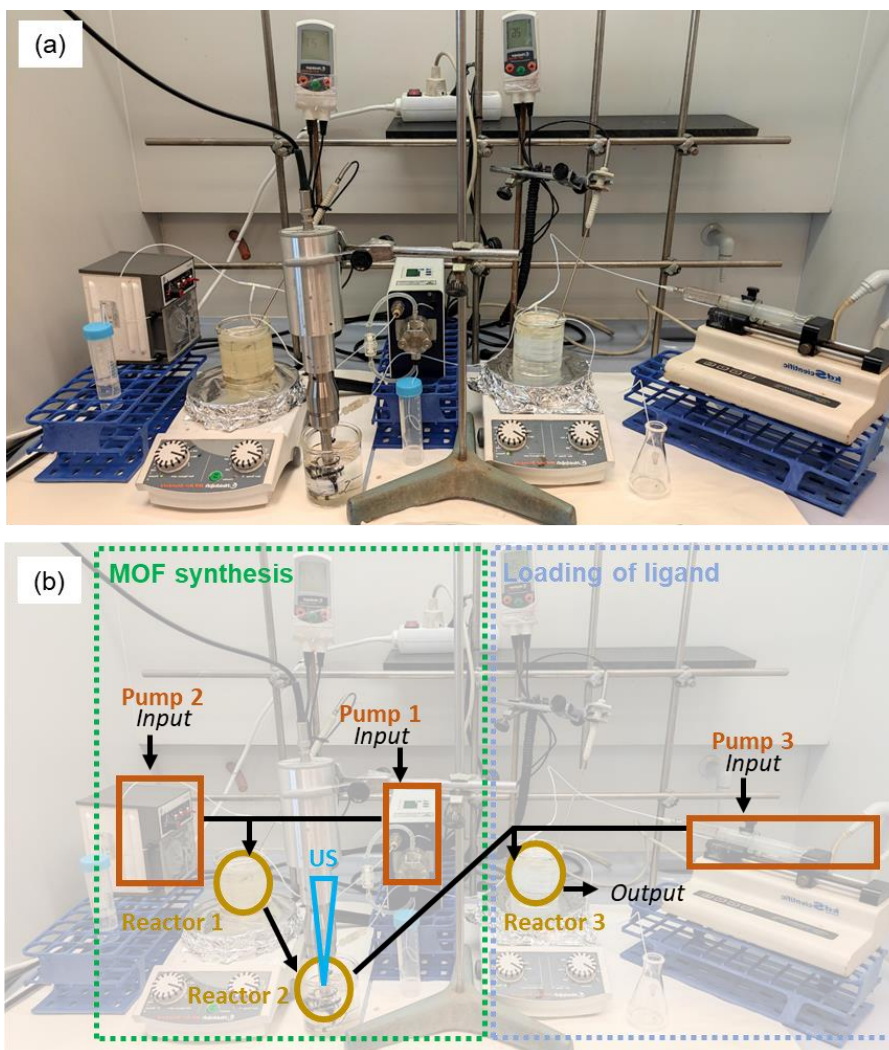

Fig. S1 (a) Picture and (b) scheme of the c.f. system.

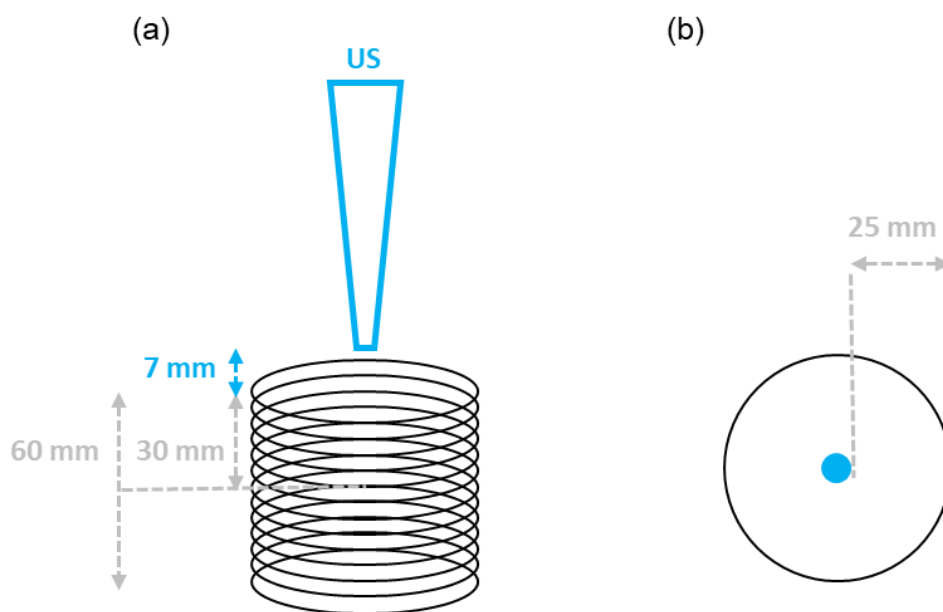

Fig. S2 Details of the position of the ultrasonic horn in Reactor 2 (a) front and (b) upper view.

## S2. Materials and methods

### *Materials*

Zr(OBu)<sub>4</sub> in n-butanol (80%<sub>w</sub>t), benzoic acid (ACS reagent, ≥99.5%), methanol (MeOH, 99.8%), isopropanol (iPrOH, natural, ≥98%), ethanol (EtOH, 96%, EMPROVE® EXPERT, Ph. Eur., BP, ChP), N,N-dimethylformamide (DMF; anhydrous, 99.8%), trifluoroacetic acid (TFA, ReagentPlus®, 99%), dimethyl sulfoxide (DMSO, ≥99%), cyclohexanone (ACS reagent, ≥99.0%), anisole (99%), dichloromethane (DCM, ≥99.8%), trichloromethane (TCM, ≥99%), toluene (99.8%), acetonitrile (CAN, 99.8%), triethylamine (≥99.5%), sodium ethoxide (95%), thionyl chloride (ReagentPlus®, ≥99%), sodium periodate (ACS reagent, ≥99.8%), Ruthenium (III) chloride trihydrate (technical grade), 2,4-Bis(4-methoxyphenyl)-2,4-dithio-1,3,2,4-dithiadiphosphetane (Lawesson's Reagent, 97%), 4-(dimethylamino)pyridine (DMAP, ReagentPlus®, ≥99%) and diisopropylethylamine (DIPEA, ReagentPlus®, ≥99%) were purchased from Merck KGaA (Darmstadt, Germany). Octaenglycol (≥98%) and tetrakis(4-carboxyphenyl)porphyrin (97%) were purchased from BLD Pharmatech Ltd (Shanghai, China). 2-acetamido-2-deoxy-1,3,4,6-tetra-oacetyl-β-D-galactopyranose was purchased from Biosynth (Staad, Switzerland). All the chemicals were used without any further purification.

### *Characterization*

Scanning Electron Microscopy (SEM) images were acquired using a HITACHI S4800 field emission microscope operating at 2 kV in secondary electron and backscattered electron modes. The samples were prepared by drying a diluted dispersion of the particles on a silicon wafer substrate under ambient conditions. Dynamic Light Scattering (DLS) measurements were performed using a Malvern Zetasizer Nano ZSP equipped with a 10 mW He–Ne laser operating at a wavelength of 633 nm. Diluted samples (ca. 0.2 mg mL<sup>-1</sup>) were loaded into a quartz cuvette, and then three measurements, each consisting of twelve data runs, were taken at room temperature (293 K) after an equilibration step of 10 sec. Powder X-Ray Diffraction (PXRD) analysis was conducted using a Bruker D8-Advance Diffractometer, employing X-ray radiation of Cu Kα. The measurement range spanned from 2° to 50° (2θ) with a step of 0.02°. Fourier-Transform Infrared Spectroscopy (FTIR) analysis was performed on a Bruker Tensor 27 spectrophotometer. Spectra were recorded at room temperature in the range of 400 to 4000 cm<sup>-1</sup> with a resolution of 2 cm<sup>-1</sup>. Dried samples were prepared on a KBr pellet. N<sub>2</sub> physisorption analysis involved carrying out N<sub>2</sub> sorption isotherms at 77 K on a Quantachrome Autosorb-iQ-2 MP/XR gas sorption analyser. Prior to analysis, the samples were degassed under vacuum at 393 K for 24 hours. Thermogravimetric analysis (TGA) of powder samples was performed using a Thermal Advantage SDT-600 instrument. The samples underwent a general heating profile from 293 K to 800 K with a heating rate of 5 K·min<sup>-1</sup> under air. <sup>1</sup>H NMR and <sup>13</sup>C NMR spectra were recorded on a 400 MHz Bruker Avance III HD spectrometer and referenced to residual solvent. For the experiments of lectin adhesion to PCN-222@SO<sub>3</sub>-PEG-S-GalNAc, 0.1 mL of a solution 10 mg mL<sup>-1</sup> of PCN-222@SO<sub>3</sub>-PEG-S-GalNAc or PCN-222 was mixed with 0.3 mL of lectins labelled with FITC or AlexaFluor594 from Invitrogen™, each at a concentration of 20 μg mL<sup>-1</sup>. The lectins used were ConA and PNA. After 5 minutes of incubation, the samples were collected by high-speed centrifugation (12,000 rpm, 15 min), washed three times with water, and exchanged one time with ethanol (EtOH). Finally, each sample was sandwiched between a microscope slide and a coverslip for observation under a fluorescence microscope (Leica DM6000) with the LAX capture software.

Details of the synthesis of the thio-*N*-acetylgalactosamine-PEG-sulfate ligand (*S*-GalNAc-PEG-sulfate)

$^1\text{H}$ -NMR and  $^{13}\text{C}$ -NMR spectra of the products are reported in the Annex at the end of the ESI.

### Synthesis of 3,4,6-triacetoxy galactosyl thiazoline **2**

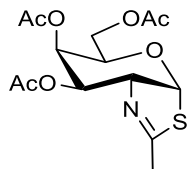

Commercially available 2-acetamido-2-deoxy-1,3,4,6-tetra-oacetyl- $\beta$ -D-galactopyranose **1** (1.5 g, 3.85 mmol, 1 eq) and Lawesson's reagent (1.87 g, 4.62 mmol, 1.2 eq) were dissolved in 12.5 mL of anhydrous toluene and stirred at 353 K under argon atmosphere. After 24 hours, the resulting suspension was neutralized with 124.7 mg of sodium bicarbonate. Toluene was then evaporated, and the crude product was purified by chromatographic column using a mixture of ethyl acetate and hexane (1:1) as the eluent. 942 mg (71%) of pure product was obtained.

$[\alpha]^{20}_{\text{D}}$ : 96.9 (c 0.8,  $\text{CHCl}_3$ )

$^1\text{H}$  RMN (400MHz,  $\text{CDCl}_3$ ):  $\delta$  6.27 (d, 1H,  $J_{1,2}=6.31\text{Hz}$ , H-1), 5.54 (t, 1H,  $J_{3,4}=J_{4,5}=3.32\text{Hz}$ , H-4), 5.23 (dd, 1H,  $J_{3,2}=8.00\text{Hz}$ ,  $J_{3,4}=3.40\text{Hz}$ , H-3), 4.41 (t, 1H,  $J_{2,1}=J_{2,3}=7.15\text{Hz}$ , H-2), 4.34-4.29 (m, 1H, H-5), 4.28-4.21 (m, 1H, H-6a), 4.15-4.09 (m, 1H, H-6b), 2.29 (d, 3H,  $J=1.61\text{Hz}$ , C-CH<sub>3</sub>), 2.15 (s, 3H, -COO-CH<sub>3</sub>), 2.11 (s, 3H, -COO-CH<sub>3</sub>), 2.08 (s, 3H, -COO-CH<sub>3</sub>).  $^{13}\text{C}$  RMN (100MHz,  $\text{CDCl}_3$ ):  $\delta$  170.5 (CO), 170.2 (CO), 169.8 (CO), 168.5 (=C-), 89.0 (C1), 74.5 (C2), 70.6 (C5), 70.5(C3), 66.3 (C4), 60.9 (C6), 21.4 (C-CH<sub>3</sub>), 20.9 (-COO-CH<sub>3</sub>), 20.7 (-COO-CH<sub>3</sub>), 20.6 (-COO-CH<sub>3</sub>).

HRMS: Calcd. for  $\text{C}_{14}\text{H}_{21}\text{O}_7\text{NS}$  346.0955  $[\text{M}+\text{H}]^+$ , found 346.0952.

### Synthesis of Thiol **3**

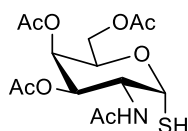

To a mixture of 330 mg (0.85 mmol, 1 eq) of thiazoline **2**, 4.76 mL of MeOH and 0.13 mL of trifluoroacetic acid were added followed by 0.4 mL of water. The mixture was stirred at 273 K for 5 h, the concentrated under vacuum. The crude mixture was purified through column chromatography, using DCM/MeOH (50:1) as the eluent, yielding 260 mg (85%) of pure product.

$[\alpha]^{20}_{\text{D}}$ : 100 (c 0.7,  $\text{CHCl}_3$ )

$^1\text{H}$  RMN (400MHz,  $\text{CDCl}_3$ ):  $\delta$  5.58 (t, 1H,  $J_{1,2}=J_{1,\text{SH}}=5.80\text{Hz}$ , H-1), 5.73 (d, 1H,  $J_{\text{NH},2}=7.68\text{Hz}$ , NH-COOH-CH<sub>3</sub>), 5.41 (d, 1H,  $J_{4,3}=2.40\text{Hz}$ , H-4), 5.09 (dd, 1H,  $J_{3,2}=11.80\text{Hz}$ ,  $J_{3,4}=3.20\text{Hz}$ , H-3), 4.81-4.70 (m, 1H, H-2), 4.53 (t, 1H,  $J_{5,6a}=J_{5,6b}=4.8\text{Hz}$ , H-5), 4.22-4.00 (m, 2H, H-6), 2.17 (s, 3H, -COO-CH<sub>3</sub>), 2.06 (s, 3H, -COO-CH<sub>3</sub>), 2.03 (s, 3H, -COO-CH<sub>3</sub>), 2.00 (s, 3H, -COO-CH<sub>3</sub>), 1.96 (d,  $J=6.6\text{Hz}$ , -SH).  $^{13}\text{C}$  RMN (100MHz,  $\text{CDCl}_3$ ):  $\delta$  171.1 (CO), 170.8 (CO), 170.5 (CO), 170.2 (CO), 79.6 (C1), 67.8 (C5), 67.7 (C3), 67.1 (C6), 61.6 (C4), 48.4 (C2), 20.8 (NHCOCH<sub>3</sub>), 20.7 (-COO-CH<sub>3</sub>), 20.7 (-COO-CH<sub>3</sub>), 20.7 (-COO-CH<sub>3</sub>).

HRMS: Calcd. for  $\text{C}_{14}\text{H}_{20}\text{O}_8\text{NSNa}$  386.0880  $[\text{M}+\text{Na}]^+$ , found 386.0876.

### Synthesis of Cyclic Sulfite **5**

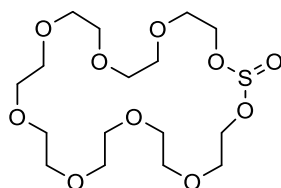

To a solution of commercially available octaethylene glycol (370 mg, 1.35 mmol, 1 eq) and DMAP (8.25 mg, 0.068 mmol, 0.05 eq), 1.14 mL of DIPEA and 48 mL of anhydrous DCM were added under argon atmosphere. The mixture was stirred for 5 minutes at 273K. Finally, 0.2 mL of SOCl<sub>2</sub> (325 mg, 2.7 mmol, 2 eq) were gradually added. The mixture was stirred at r.t. for 1 h. Subsequently, it was washed with a saturated NaCl solution and extracted twice with DCM. The resulting solution was dried with MgSO<sub>4</sub>, filtered, and the DCM evaporated under vacuum. The crude product was purified through column chromatography using DCM:MeOH (30:1) as the eluent, yielding 511 mg (91%) of pure product.

**<sup>1</sup>H RMN (500MHz, CDCl<sub>3</sub>):** δ 4.25-4.10 (m, 4H, 2 -CH<sub>2</sub>-OSO<sub>2</sub>-O-), 3.79-3.71 (m, 4H, 2 -CH<sub>2</sub>-CH<sub>2</sub>-OSO<sub>2</sub>-O-), 3.70-3.61 (m, 24H, 12 OCH<sub>2</sub>). **<sup>13</sup>C RMN (125MHz, CDCl<sub>3</sub>):** δ 70.7 (6 CH<sub>2</sub>O-), 70.6 (6 CH<sub>2</sub>O-), 69.5 (2 -CH<sub>2</sub>-OSO<sub>2</sub>-O), 61.5 (2 -CH<sub>2</sub>-OSO<sub>2</sub>-O).

**HRMS:** Calcd. for C<sub>16</sub>H<sub>32</sub>O<sub>10</sub>NaS 439.1608 [M+Na]<sup>+</sup>, found 439.1600

### Synthesis of Cyclic Sulfate **6**

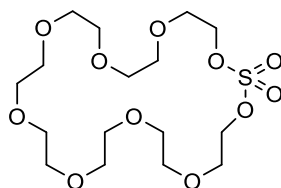

To 1.4 g (3.36 mmol, 1 eq) of cyclic sulfite **5**, 30.7 mL of ACN, 30.7 mL of TCM, and 46 mL of water were added. The mixture was stirred for 5 minutes at 273 K. Then, 1.8 g (8.4 mmol, 2.5 eq) of NaIO<sub>4</sub> and 20.91 mg (0.1 mmol, 0.03 eq) of RuCl<sub>3</sub>·3H<sub>2</sub>O were added. The mixture is stirred at room temperature for 4 h. Next, the two obtained phases were separated, and the aqueous phase was washed twice with DCM. The resulting solution of the combined organic phases was dried with MgSO<sub>4</sub>, filtered, and the solvent was evaporated. The crude product was purified through column chromatography using DCM:MeOH (40:1) as the eluent, yielding 1.15 g (79%) of pure product.

**<sup>1</sup>H RMN (500MHz, CDCl<sub>3</sub>):** δ 4.25 (t, 4H, J=4.61Hz, 2 -CH<sub>2</sub>-OSO<sub>2</sub>-O-), 3.62 (t, 4H, J=4.47Hz, 2 -CH<sub>2</sub>-CH<sub>2</sub>-OSO<sub>2</sub>-O-), 3.52-3.36 (m, 24H, 12 OCH<sub>2</sub>). **<sup>13</sup>C RMN (125MHz, CDCl<sub>3</sub>):** δ 72.1 (2 -CH<sub>2</sub>-OSO<sub>2</sub>-O), 70.5 (9 CH<sub>2</sub>O-), 70.4 (3 CH<sub>2</sub>O-), 68.1 (2 -CH<sub>2</sub>-OSO<sub>2</sub>-O).

**HRMS:** Calcd. for C<sub>16</sub>H<sub>32</sub>O<sub>11</sub>NaS 455.1557 [M+Na]<sup>+</sup>, found 455.1548

### Synthesis of Sulfate 7

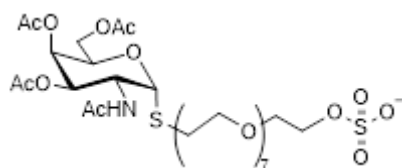

To 50 mg (0.14 mmol, 1 eq) of cyclic sulfate **6**, 0.1 mL of Et<sub>3</sub>N (triethylamine) and 0.25 mL of DMF (dimethylformamide) are added. To this solution, another solution containing 116 mg (0.16 mmol, 1.17 eq) of thiol **3** in 0.25 mL of DMF is added. The mixture is stirred at room temperature for 1 hour. The crude product is purified through column chromatography using DCM:MeOH (30:1) as the eluent, yielding 67.6 mg (61%) of pure product.

**<sup>1</sup>H RMN (500MHz, CDCl<sub>3</sub>):** δ 6.23 (d, 1H, J<sub>NH,2</sub>=8.23Hz, NH-COOH-CH<sub>3</sub>), 5.62 (d, 1H, J<sub>1,2</sub>=5.24Hz, H-1), 5.42 (s, 1H, H-4), 5.07 (dd, 1H, J<sub>3,2</sub>=11.70Hz, J<sub>3,4</sub>=2.84Hz, H-3), 4.78-4.71 (m, 1H, H-2), 4.56 (t, 1H, J<sub>5,6a</sub>=J<sub>5,6b</sub>=6.40Hz, H-5), 4.23 (t, 2H, J=3.83Hz, CH<sub>2</sub>-OSO<sub>3</sub><sup>-</sup>), 4.17-4.11 (m, 1H, H-6a), 4.11-4.05 (m, 1H, H-6b), 3.77-3.47 (m, 28H, 14 OCH<sub>2</sub>), 2.91-2.73 (m, 2H, S-CH<sub>2</sub>-CH<sub>2</sub>-), 2.16 (s, 3H, -COO-CH<sub>3</sub>), 2.06 (s, 3H, -COO-CH<sub>3</sub>), 2.01 (s, 3H, -COO-CH<sub>3</sub>), 2.00 (s, 3H, -COO-CH<sub>3</sub>). **<sup>13</sup>C RMN (125MHz, CDCl<sub>3</sub>):** δ 171.0 (CO), 170.7 (CO), 170.4 (CO), 170.3 (CO), 84.9 (C1), 70.3 (-CH<sub>2</sub>-), 70.1 (-CH<sub>2</sub>-), 70.0 (-CH<sub>2</sub>-), 69.9 (-CH<sub>2</sub>-), 69.9 (-CH<sub>2</sub>-), 69.7 (-CH<sub>2</sub>-), 69.6 (-CH<sub>2</sub>-), 69.6 (-CH<sub>2</sub>-), 69.6 (-CH<sub>2</sub>-), 69.5 (-CH<sub>2</sub>-), 69.5 (-CH<sub>2</sub>-), 69.4 (-CH<sub>2</sub>-), 69.3 (-CH<sub>2</sub>-), 68.4 (C3), 67.3 (C4), 67.1 (C5), 66.4 (-CH<sub>2</sub>-), 61.2 (C6), 48.3 (C2), 30.2 (-CH<sub>2</sub>-), 23.2 (CH<sub>3</sub>), 20.8 (CH<sub>3</sub>), 20.7 (CH<sub>3</sub>), 20.7 (CH<sub>3</sub>).

**HRMS:** Calcd. for C<sub>30</sub>H<sub>53</sub>O<sub>19</sub>NNaS<sub>2</sub> 818.2545 [M+H+Na]<sup>+</sup>, found 818.2542

### Synthesis of Ligand 8 (S-GalNAc-PEG-sulfate)

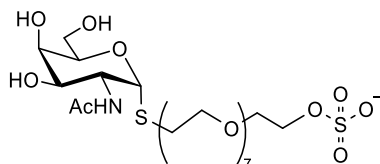

To 60 mg (0.076 mmol, 1 eq) of sulfate **6**, 3 mL of MeOH (methanol) and 0.20 mL of MeONa (sodium methoxide) are added. The mixture is stirred at room temperature for 30 minutes under an argon atmosphere. Then, Amberlite is added until the pH of the solution is neutralized. The mixture is filtered, and MeOH is evaporated. 51 mg (100%) of pure product is obtained.

**<sup>1</sup>H RMN (500MHz, MeOD):** δ 5.63 (d, 1H, J<sub>1,2</sub>=5.39Hz, H-1), 4.45-4.39 (m, 1H, H-2), 4.22-4.13 (m, 3H, H-5, SO<sub>4</sub>-CH<sub>2</sub>-), 3.93 (d, 1H, J<sub>4,3</sub>=3.29Hz, H-4), 3.80-3.63 (m, 31H, H-6, H-3, 14 OCH<sub>2</sub>), 2.92-2.68 (m, 2H, S-CH<sub>2</sub>-CH<sub>2</sub>-), 2.00 (s, 3H, -COO-CH<sub>3</sub>). **<sup>13</sup>C RMN (125MHz, MeOD):** δ 172.5 (CO), 84.3 (C1), 71.6 (-CH<sub>2</sub>-OSO<sub>3</sub><sup>-</sup>), 70.4 (-CH<sub>2</sub>-), 69.7 (-CH<sub>2</sub>-), 69.7 (-CH<sub>2</sub>-), 69.6 (-CH<sub>2</sub>-), 69.6 (-CH<sub>2</sub>-), 69.6 (-CH<sub>2</sub>-), 69.5 (-CH<sub>2</sub>-), 69.5 (-CH<sub>2</sub>-), 69.5 (-CH<sub>2</sub>-), 69.4 (-CH<sub>2</sub>-), 69.4 (-CH<sub>2</sub>-), 69.4 (-CH<sub>2</sub>-), 69.3 (-CH<sub>2</sub>-), 68.9 (C4), 67.9 (C3), 66.8 (C5), 61.4 (C6), 50.5 (C2), 29.2 (-S-CH<sub>2</sub>-), 21.3 (CH<sub>3</sub>).

**MS (ESI, m/z):** Calcd for C<sub>24</sub>H<sub>46</sub>O<sub>16</sub>NS<sub>2</sub><sup>-</sup> 668.23 [M]<sup>-</sup>, found 668.39

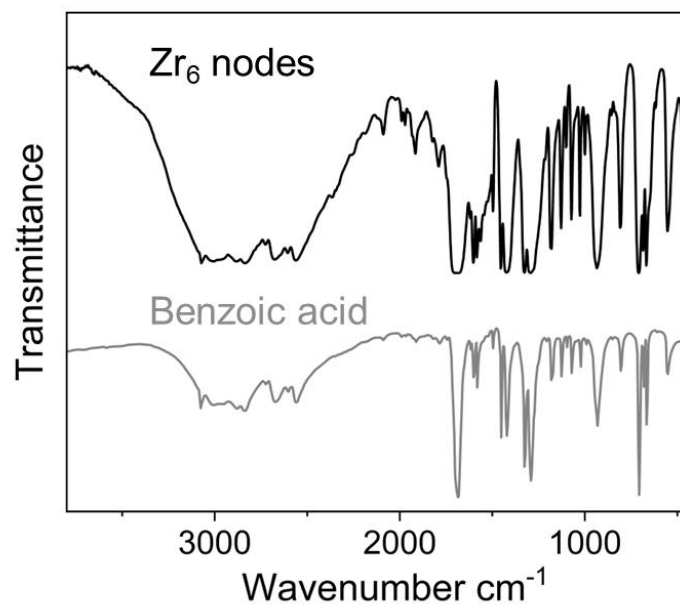

**Fig. S3** FTIR analysis of the Zr<sub>6</sub> nodes and of benzoic acid.

### S3. Preliminary tests for batch optimization

**Table S1** Preliminary optimization for batch synthesis.

| Entry | Changed parameter        | Space-Time-Yield (STY) (Kg m <sup>-3</sup> day <sup>-1</sup> ) |
|-------|--------------------------|----------------------------------------------------------------|
| 1     | 0.5 L:M                  | 3.38±1.1                                                       |
| 2     | 3.5 L:M                  | 11.48±2.8                                                      |
| 3     | 10 mL DMF                | 2.74±0.8                                                       |
| 4     | 6 mL DMF                 | 5.11±1.2                                                       |
| 5     | 90 µL TFA (L:Mod 0.024)  | 3.11±0.9                                                       |
| 6     | 150 µL TFA (L:Mod 0.015) | 2.97±0.4                                                       |

Reaction conditions: 393 K, 5 h, 8 mL DMF, 10 mL volume of reactor. Entries 3-6: 22.5 mg TCPP (0.0284 mmol, 3.55 mM), 38 mg Zr<sub>6</sub> nodes (L:M 0.9). Entries 1-4: 130 µL TFA (L:Mod 0.017).

**Table S2** Experimental details for the optimization of the ligand-to-metal center molar ratio (L:M) in batch.

| Entry | Mass Zr <sub>6</sub> nodes (mg) | Mol Zr <sub>6</sub> nodes | L:M | STY (Kg m <sup>-3</sup> day <sup>-1</sup> ) | TCPP conversion (%) | Size (nm) |
|-------|---------------------------------|---------------------------|-----|---------------------------------------------|---------------------|-----------|
| 1     | 13                              | 0.0112                    | 2.5 | 3.4±0.3                                     | 22.1±1.9            | 101±9     |
| 2     | 16                              | 0.0137                    | 2   | 3.5±0.5                                     | 22.7±3.2            | 114±10    |
| 3     | 25                              | 0.0215                    | 1.3 | 3.8±0.4                                     | 24.7±2.6            | 132±11    |
| 4     | 33                              | 0.0284                    | 1   | 5.5±0.6                                     | 35.7±3.8            | 222±12    |
| 5     | 45                              | 0.0387                    | 0.7 | 6.0±0.5                                     | 38.9±3.2            | 248±19    |
| 6     | 70                              | 0.0601                    | 0.5 | 7.1±0.7                                     | 46.1±4.5            | 250±25    |
| 7     | 90                              | 0.0773                    | 0.4 | 10.1±0.4                                    | 65.6±2.6            | 273±80    |
| 8     | 120                             | 0.1031                    | 0.3 | 11.5±0.8                                    | 74.7±5.2            | 287±110   |

Reaction conditions: 393 K, 5 h, 22.5 mg TCPP (0.0284 mmol, 3.55 mM), 8 mL DMF, 130 µL TFA (L:Mod 0.017), 10 mL volume of reactor. Theoretical yield 32.25 mg of PCN-222 (theoretical STY: 15.36 Kg m<sup>-3</sup> day<sup>-1</sup>).

**Table S3** Green metrics of selected experiments for the optimization of the ligand-to-metal center molar ratio (L:M) in batch.

| Entry | L:M | Mass of reagents (mg) | Mass waste (mg) | PCN-222 (mg) | E-factor no solvents | RME(%) no solvents | E-factor with solvents |
|-------|-----|-----------------------|-----------------|--------------|----------------------|--------------------|------------------------|
| 4     | 1   | 249.2                 | 237.7           | 11.5         | 20.7                 | 4.6                | 1129                   |
| 5     | 0.7 | 261.2                 | 248.7           | 12.5         | 19.9                 | 4.8                | 1040                   |
| 6     | 0.5 | 286.2                 | 271.4           | 14.8         | 18.3                 | 5.2                | 879                    |

Reaction conditions: 393 K, 5 h, 22.5 mg TCPP (0.0284 mmol), 8 mL DMF, 130 µL TFA (L:Mod 0.017), 10 mL volume of reactor. When solvents were considered for E-factor calculations, a total of 11 mL of DMF (8 mL for reaction, 3 mL for washing) and 3 mL of EtOH were used. Densities for DMF and EtOH are 0.944 and 0.789 g mL<sup>-1</sup> respectively.



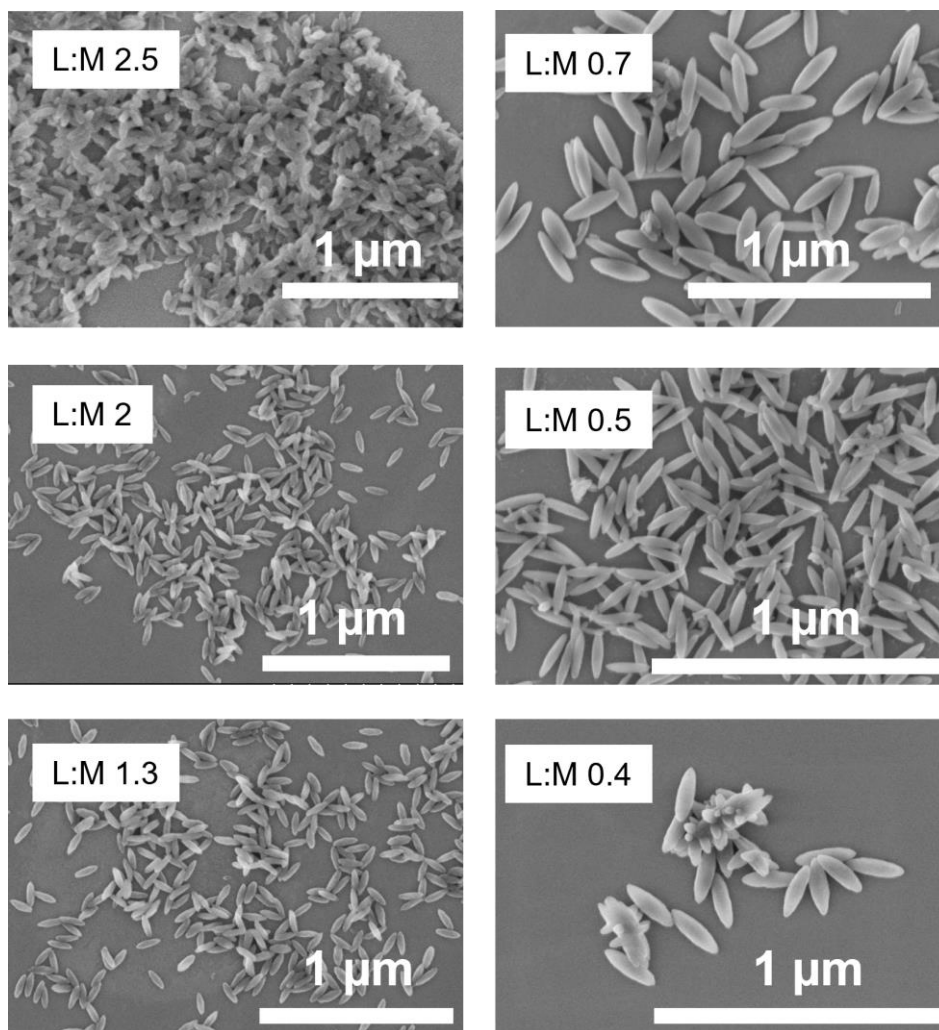

**Fig. S4** SEM images of the experiments for the optimization of the ligand-to-metal center molar ratio (L:M) in batch.

#### S4. Relevant publications related to the c.f. synthesis of MOFs

**Table S4** Most relevant publications reporting the c.f. synthesis of different MOFs.

| Type of MOF                                                            | T (K) | Pressure | Residence time | Rate or Space Time Yield (STY)                              | Size (nm) | Ref. |
|------------------------------------------------------------------------|-------|----------|----------------|-------------------------------------------------------------|-----------|------|
| UiO-66                                                                 | 393   | 100      | 3 sec          | 104 g h <sup>-1</sup>                                       | 211       | 1    |
| MOF-808                                                                | 423   | /        | 5 min          | 95155 kg m <sup>-3</sup> day <sup>-1</sup>                  | 140       | 2    |
| UMCM-1, MUF-77                                                         | 358   | 5        | /              | 1.15 g h <sup>-1</sup>                                      | 100       | 3    |
| UiO-66-NH <sub>2</sub> , Zr-fumarate                                   | 363   | /        | 5.5 h          | 7.3 g h <sup>-1</sup>                                       | >2000     | 4    |
| UiO-66, Fe-BTC, MIL-100                                                | 388   | /        | 63 sec         | 19.6 kg m <sup>-3</sup> day <sup>-1</sup>                   | >1000     | 5    |
| MOF-801, MOF-804, MOF-808, DUT-67                                      | 273   | /        | 32-80 min      | 367.2 kg m <sup>-3</sup> day <sup>-1</sup>                  | 100-500   | 6    |
| Ni <sub>2</sub> Cl <sub>2</sub> (BTDD)                                 | 413   | /        | 30-60 min      | 1 kg month <sup>-1</sup>                                    | 1000      | 7    |
| ZIF-8                                                                  | 273   | /        | 30 sec         | 5 mL min <sup>-1</sup>                                      | 40-100    | 8    |
| MOF-74(Ni)                                                             | 343   | /        | /              | 90 g h <sup>-1</sup> l <sup>-1</sup>                        | >1000     | 9    |
| HKUST-1                                                                | 343   | /        | /              | 6.32 · 10 <sup>5</sup> kg m <sup>-3</sup> day <sup>-1</sup> | >1000     | 10   |
| UiO-66                                                                 | 363   | /        | 22 min         | 0.24 mL min <sup>-1</sup>                                   | >1000     | 11   |
| MgFe <sub>2</sub> O <sub>4</sub> @UiO-66-NH <sub>2</sub>               | 403   | 10       | 15min          | 215.3 kg m <sup>-3</sup> day <sup>-1</sup>                  | 20-200    | 12   |
| UiO-67                                                                 | 413   | /        | 30 min         | 428 kg m <sup>-3</sup> day <sup>-1</sup>                    | 200-400   | 13   |
| MIL-53(Al)                                                             | 523   | /        | /              | 1300 kg m <sup>-3</sup> day <sup>-1</sup>                   | /         | 14   |
| MIL-53(Cr)                                                             | 423   | 5        | 3.5 min        | 7188 kg m <sup>-3</sup> day <sup>-1</sup>                   | 200-1000  | 15   |
| UiO-66-(OH) <sub>2</sub> , Zr-fumarate, Zr-mesaconate, DUT-67, MOF-808 | 358   | /        | 22 min         | 2733 kg m <sup>-3</sup> day <sup>-1</sup>                   | /         | 16   |
| UiO-66(Zr)-(OH) <sub>2</sub>                                           | 383   | /        | 10 min         | 6.79 g h <sup>-1</sup>                                      | 10-200    | 17   |
| UiO-67                                                                 | 393   | /        | 10 min         | 6.10 g h <sup>-1</sup>                                      | /         | 18   |
| HKUST-1                                                                | 343   | 10       | 70-167 sec     | 2685 kg m <sup>-3</sup> day <sup>-1</sup>                   | 100-250   | 19   |
| CPO-27-Ni                                                              | 363   | /        | 20 min         | 2 mL min <sup>-1</sup>                                      | 40        | 20   |
| ZrBTB                                                                  | 403   | /        | 32 min         | 385.03 kg m <sup>-3</sup> day <sup>-1</sup>                 | >1000     | 21   |
| MIL-100                                                                | 383   | /        | 50 min         | 771.6 kg m <sup>-3</sup> day <sup>-1</sup>                  | 100-500   | 22   |
| MIL-88 serie                                                           | 368   | /        | 20-600 sec     | 103-618 µl min <sup>-1</sup>                                | 90-900    | 23   |
| Ln-BTC·6H <sub>2</sub> O                                               | 333   | /        | 50 min         | 426 kg m <sup>-3</sup> day <sup>-1</sup>                    | 200-300   | 24   |
| ZIF-67                                                                 | 393   | /        | 3 min          | 57000 kg m <sup>-3</sup> day <sup>-1</sup>                  | 150-400   | 25   |

/=not reported

### S5. Calculation of Re, De and residence time ( $\tau$ )

Table S5 Parameters of Reactor 1.

| REACTOR 1                     |                                           |
|-------------------------------|-------------------------------------------|
| Length                        | 560 cm                                    |
| Diameter                      | 0.08 cm                                   |
| Volume                        | 2.8 mL                                    |
| Hellicoid height <sup>o</sup> | 6 cm                                      |
| Radius of the curvature       | 2.85 cm                                   |
| DMF density                   | 0.944 g mL <sup>-1</sup>                  |
| DMF Dinamic Viscosity         | 0.0089 g cm <sup>-1</sup> s <sup>-1</sup> |

Table S6 Data of the flow pattern of Reactor 1.

| Flow (mL min <sup>-1</sup> ) | Fluid velocity (cm s <sup>-1</sup> ) | Re    | De   | $\tau$ (sec) |
|------------------------------|--------------------------------------|-------|------|--------------|
| 0.1                          | 0.33                                 | 2.8   | 0.3  | 1680         |
| 0.2                          | 0.67                                 | 5.7   | 0.7  | 840          |
| 0.3                          | 1.00                                 | 8.5   | 1.0  | 560          |
| 0.5                          | 1.67                                 | 14.1  | 1.7  | 336          |
| 1                            | 3.33                                 | 28.3  | 3.4  | 168          |
| 2                            | 6.67                                 | 56.6  | 6.7  | 84           |
| 3                            | 10.00                                | 84.9  | 10.1 | 56           |
| 4                            | 13.33                                | 113.1 | 13.4 | 42           |
| 5                            | 16.67                                | 141.4 | 16.8 | 33.6         |
| 10                           | 33.33                                | 282.8 | 33.5 | 16.8         |

**S6. Details of the effect of the concentration of the reagents, the volumetric flow rate, the amount of employed acid modulator, and the temperature of the reactions on the STY and on the size-distribution of PCN-222**

*Concentration of the reagents (volume of solvent)*

**Table S7** Experimental details for the optimization of the concentration of the reagents in c.f.

| Entry | [TCPP] (mM) | STY ( $\text{Kg m}^{-3} \text{ day}^{-1}$ ) | Size (nm) |
|-------|-------------|---------------------------------------------|-----------|
| 1     | 7.1         | 486±24                                      | 232±60    |
| 2     | 5.7         | 324±18                                      | 166±32    |
| 3     | 4.7         | 238±22                                      | 131±20    |
| 4     | 4.1         | 151±10                                      | 125±19    |
| 5     | 3.6         | 108±12                                      | 99±15     |
| 6     | 3.2         | 53±8                                        | 91±19     |

Reaction conditions: 393 K, total flow  $1 \text{ mL min}^{-1}$ , L:M=1, L:Mod=0.027, solvent DMF, 2.8 mL volume of the reactor.

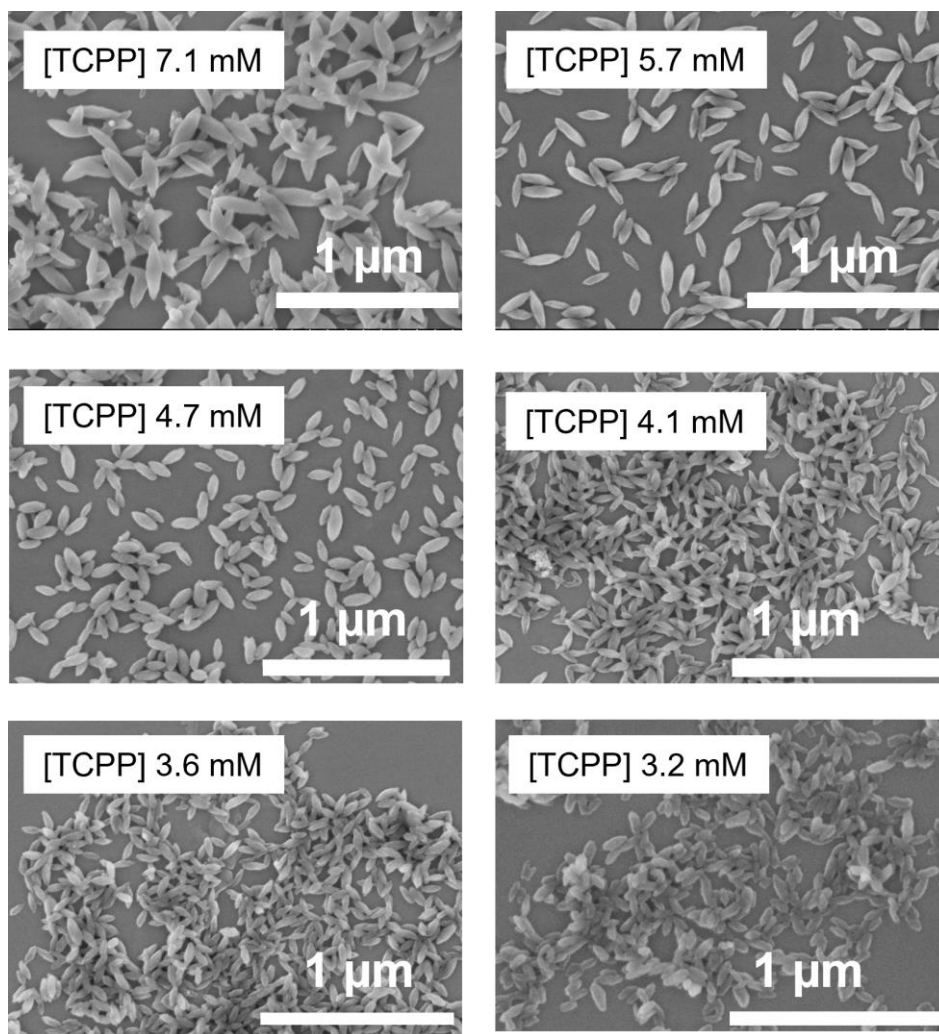

**Fig. S5** SEM images of the experiments for the optimization of the concentration of the reagents in c.f..

**Table S8** Green metrics of the experiments of the optimization of the concentration of the reagents in c.f..

| Entry | [TCPP] (mM) | E-factor no solvents | RME(%)no solvents | E-factor with solvents |
|-------|-------------|----------------------|-------------------|------------------------|
| 1     | 7.1         | 45.4                 | 2.2               | 1,377                  |
| 2     | 5.7         | 54.9                 | 1.8               | 2,053                  |
| 3     | 4.7         | 61.7                 | 1.6               | 2,782                  |
| 4     | 4.1         | 85.3                 | 1.2               | 4,374                  |
| 5     | 3.6         | 104.9                | 0.9               | 6,101                  |
| 6     | 3.2         | 190.8                | 0.5               | 12,409                 |

Reaction conditions: 393 K, total flow 1 mL min<sup>-1</sup>, L:M=1, L:Mod=0.027, solvent DMF, 2.8 mL volume of the reactor. When solvents were considered for E-factor calculations, a total of 3.15 mL of DMF (for reaction and for washing) and 0.7 mL of EtOH were used for the volume of the reactor. Densities for DMF and EtOH are 0.944 and 0.789 g mL<sup>-1</sup> respectively.

**Table S9** Experimental details for the optimization of the flow rate..

| Entry | Flow rate (mL min <sup>-1</sup> ) | STY (Kg m <sup>-3</sup> day <sup>-1</sup> ) | TCPP Conv (%) | Size (nm) |
|-------|-----------------------------------|---------------------------------------------|---------------|-----------|
| 1     | 0.1                               | 40±9                                        | 14.7±3.3      | 90±50     |
| 2     | 0.2                               | 84±6                                        | 15.4±1.1      | 98±42     |
| 3     | 0.3                               | 118±15                                      | 14.4±1.8      | 113±40    |
| 4     | 0.5                               | 161±12                                      | 11.8±0.9      | 118±14    |
| 5     | 1                                 | 252±15                                      | 9.2±0.5       | 125±16    |
| 6     | 2                                 | 517±25                                      | 9.5±0.5       | 97±18     |
| 7     | 3                                 | 734±31                                      | 8.9±0.4       | 96±16     |
| 8     | 4                                 | 749±33                                      | 6.9±0.3       | 95±20     |
| 9     | 5                                 | 744±24                                      | 5.5±0.2       | 87±19     |

Reaction conditions: 393 K, [TCPP]=4.7 mM. L:M=1, L:Mod=0.027, solvent DMF, 2.8 mL volume of the reactor.

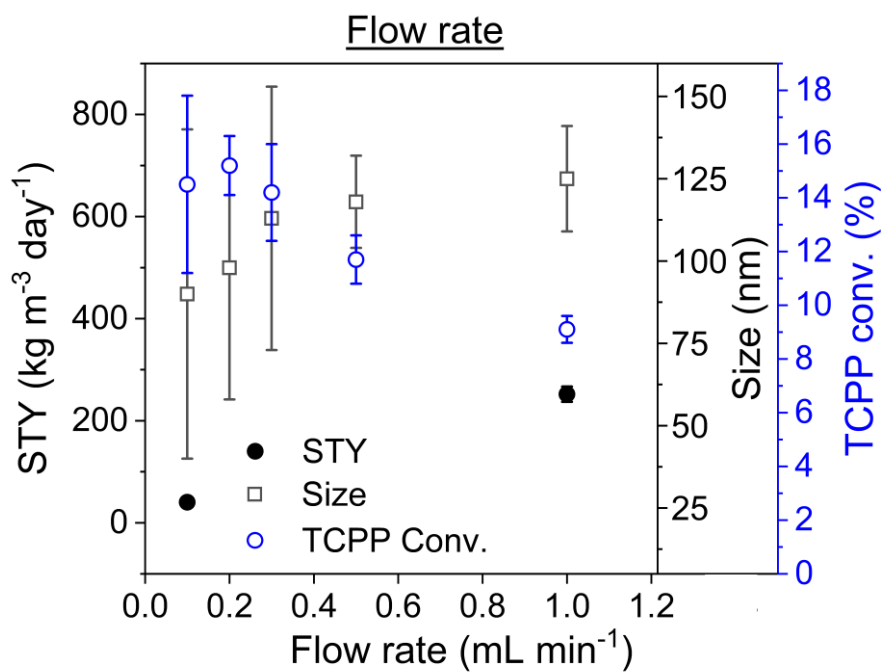

**Fig. S6** Details of the effect of the flow rate (0.1-1 mL min<sup>-1</sup>) on the STY and on the size-distribution of PCN-222.

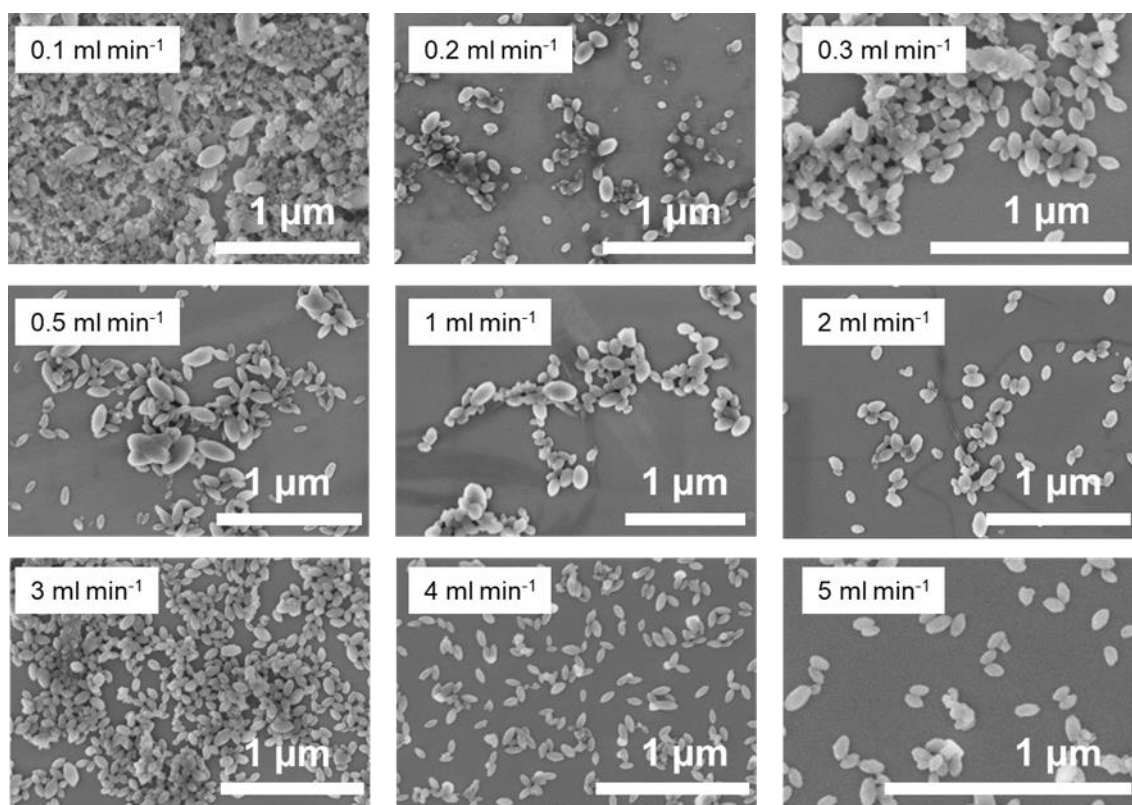

**Fig. S7** SEM images of the experiments for the optimization of the flow rate.

**Table S10** Green metrics of the experiments of the optimization of the flow rate.

| Entry | Flow rate (mL min <sup>-1</sup> ) | E-factor no solvents | RME(%)no solvents | E-factor with solvents |
|-------|-----------------------------------|----------------------|-------------------|------------------------|
| 1     | 0.1                               | 37.6                 | 2.6               | 1,657                  |
| 2     | 0.2                               | 35.8                 | 2.7               | 1,578                  |
| 3     | 0.3                               | 38.2                 | 2.5               | 1,685                  |
| 4     | 0.5                               | 46.9                 | 2.1               | 2,058                  |
| 5     | 1                                 | 60.3                 | 1.6               | 2,630                  |
| 6     | 2                                 | 58.7                 | 1.7               | 2,564                  |
| 7     | 3                                 | 62.1                 | 1.6               | 2,709                  |
| 8     | 4                                 | 81.4                 | 1.2               | 3,540                  |
| 9     | 5                                 | 102.7                | 1.0               | 4,455                  |

Reaction conditions: 393 K, [TCPP]=4.7 mM. L:M=1, L:Mod=0.027, solvent DMF, 2.8 mL volume of the reactor. When solvents were considered for E-factor calculations, a total of 3.15 mL of DMF (for reaction and for washing) and 0.7 mL of EtOH were used for the volume of the reactor. Densities for DMF and EtOH are 0.944 and 0.789 g mL<sup>-1</sup> respectively.

**Table S11** Experimental details for the optimization of the acid modulator concentration in c.f..

| Entry | L:Mod | STY ( $\text{Kg m}^{-3} \text{ day}^{-1}$ ) | Size (nm) |
|-------|-------|---------------------------------------------|-----------|
| 1     | 0.054 | 385±28                                      | n.d.      |
| 2     | 0.036 | 809±41                                      | 44±35     |
| 3     | 0.027 | 801±65                                      | 93±28     |
| 4     | 0.022 | 694±54                                      | 98±12     |
| 5     | 0.018 | 667±33                                      | 105±18    |
| 6     | 0.015 | 478±20                                      | 153±25    |
| 7     | 0.011 | 231±28                                      | 210±35    |
| 8     | 0.007 | 184±23                                      | n.d.      |

Reaction conditions: 393 K, L:M=1, flow rate 3 mL min<sup>-1</sup>, [TCPP]=4.7 mM, flow rate 3 mL min<sup>-1</sup>, solvent DMF, 2.8 mL volume of the reactor.

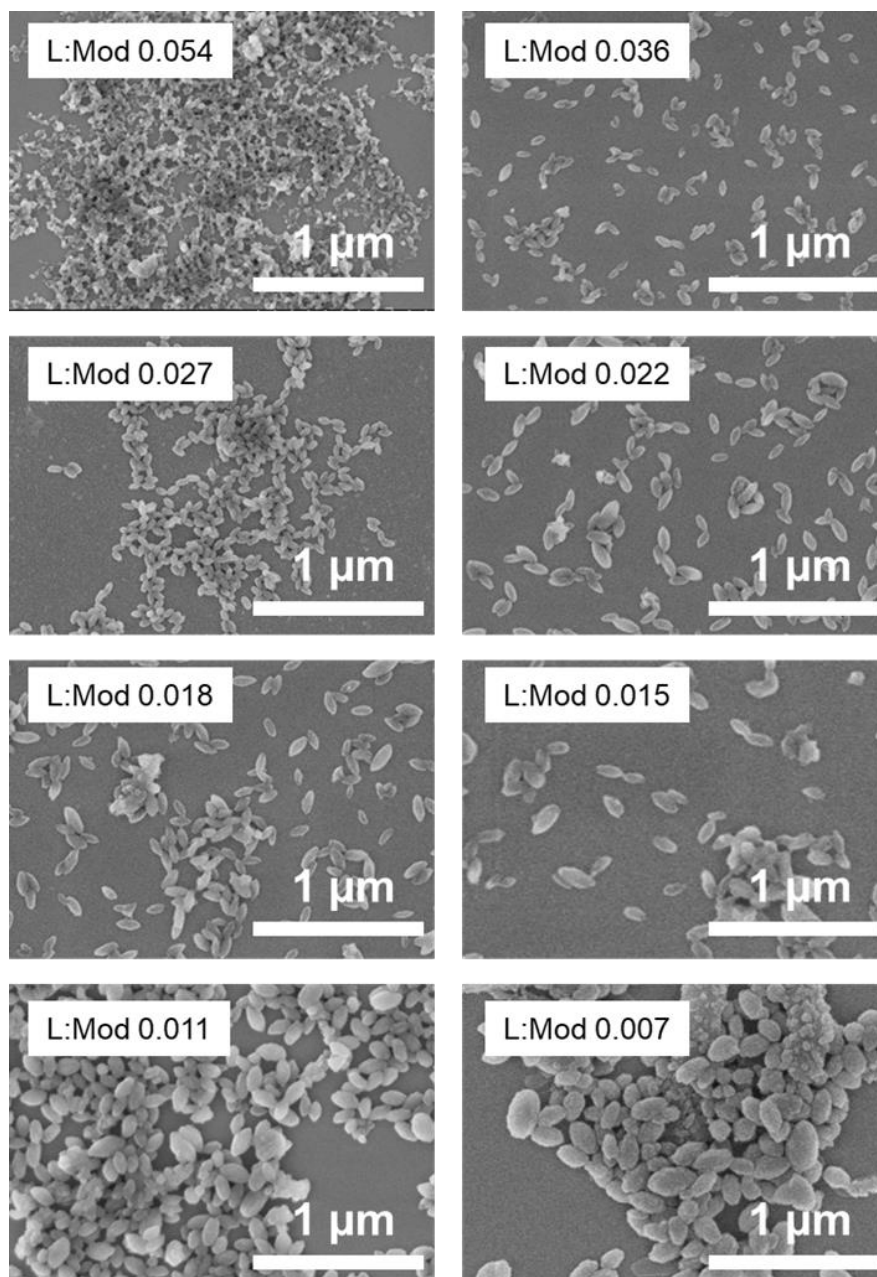

**Fig. S8** SEM images of the experiments for the optimization of the acid modulator concentration in c.f..



**Table S12** Green metrics of the experiments of the optimization of the acid modulator concentration in c.f..

| Entry | L:Mod | E-factor no solvents | RME(%)no solvents | E-factor with solvents |
|-------|-------|----------------------|-------------------|------------------------|
| 1     | 0.054 | 79.5                 | 1.2               | 5,126                  |
| 2     | 0.036 | 46.8                 | 2.1               | 2,448                  |
| 3     | 0.027 | 56.8                 | 1.7               | 2,482                  |
| 4     | 0.022 | 75.8                 | 1.3               | 2,875                  |
| 5     | 0.018 | 91.4                 | 1.1               | 3,004                  |
| 6     | 0.015 | 147.1                | 0.7               | 4,212                  |
|       | 0.011 | 392.3                | 0.3               | 8,803                  |
|       | 0.007 | 726.1                | 0.1               | 11,285                 |

Reaction conditions: 393 K, L:M=1, flow rate 3 mL min<sup>-1</sup>, [TCPP]=4.7 mM, flow rate 3 mL min<sup>-1</sup>, solvent DMF, 2.8 mL volume of the reactor. When solvents were considered for E-factor calculations, a total of 3.15 mL of DMF (for reaction and for washing) and 0.7 mL of EtOH were used for the volume of the reactor. Densities for DMF and EtOH are 0.944 and 0.789 g mL<sup>-1</sup> respectively.

Temperature

**Table S13** Experimental details for the optimization of the temperature of the reaction in c.f..

| Entry | Temperature (K) | STY ( $\text{Kg m}^{-3} \text{ day}^{-1}$ ) | SEM size (nm) |
|-------|-----------------|---------------------------------------------|---------------|
| 1     | 383             | 386±32                                      | 77±12         |
| 2     | 388             | 568±37                                      | 83±12         |
| 3     | 393             | 738±51                                      | 108±13        |
| 4     | 398             | 864±44                                      | 109±15        |
| 5     | 403             | 926±58                                      | 111±16        |
| 6     | 408             | 972±36                                      | 115±16        |
| 7     | 413             | 1002±47                                     | 113±27        |
| 8     | 418             | n.d.                                        | n.d.          |

Reaction conditions: L:M=1, L:Mod=0.027, [TCPP]=4.7 mM, flow rate 3 mL min<sup>-1</sup>, solvent DMF, 2.8 mL volume of the reactor.

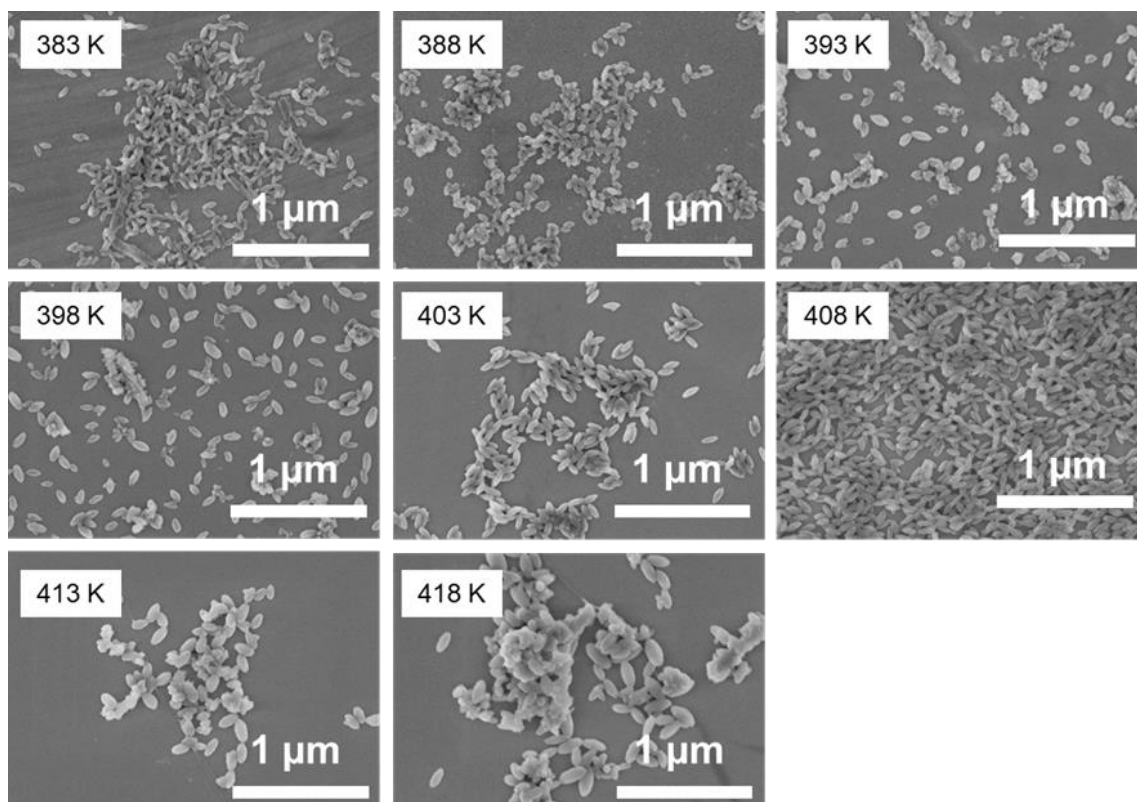

**Fig. S9** SEM images of the experiments for the optimization of the temperature of the reaction in c.f..

**Table S14** Green metrics of the experiments for the optimization of the temperature of the reaction in c.f..

| Entry | Temperature (K) | E-factor no solvents | RME(%)no solvents | E-factor with solvents |
|-------|-----------------|----------------------|-------------------|------------------------|
| 1     | 383             | 119.0                | 0.8               | 5,152                  |
| 2     | 388             | 80.5                 | 1.2               | 3,501                  |
| 3     | 393             | 61.7                 | 1.6               | 2,694                  |
| 4     | 398             | 52.6                 | 1.9               | 2,301                  |
| 5     | 403             | 49.0                 | 2.0               | 2,147                  |
| 6     | 408             | 46.6                 | 2.1               | 2,045                  |
| 7     | 413             | 45.2                 | 2.2               | 1,984                  |
| 8     | 418             | n.d.                 | n.d.              | n.d.                   |

Reaction conditions: L:M=1, L:Mod=0.027, [TCPP]=4.7 mM, flow rate 3 mL min<sup>-1</sup>, solvent DMF, 2.8 mL volume of the reactor. When solvents were considered for E-factor calculations, a total of 3.15 mL of DMF (for reaction and for washing) and 0.7 mL of EtOH were used for the volume of the reactor. Densities for DMF and EtOH are 0.944 and 0.789 g mL<sup>-1</sup> respectively.

## S7. Residence time distribution and pulse experiment

In a pulse input experiment, an amount of pulse tracer is rapidly injected in one shot into the feed stream entering the reactor. Thus, the outlet concentration is measured as a function of time. TCPP was selected as tracer since it's one of the reagents and considering its UV-Vis absorption spectrum. Initially, a calibration curve was determined varying the concentration of TCPP from 0.05 to 0.00025 mM, as shown in Fig. S10.

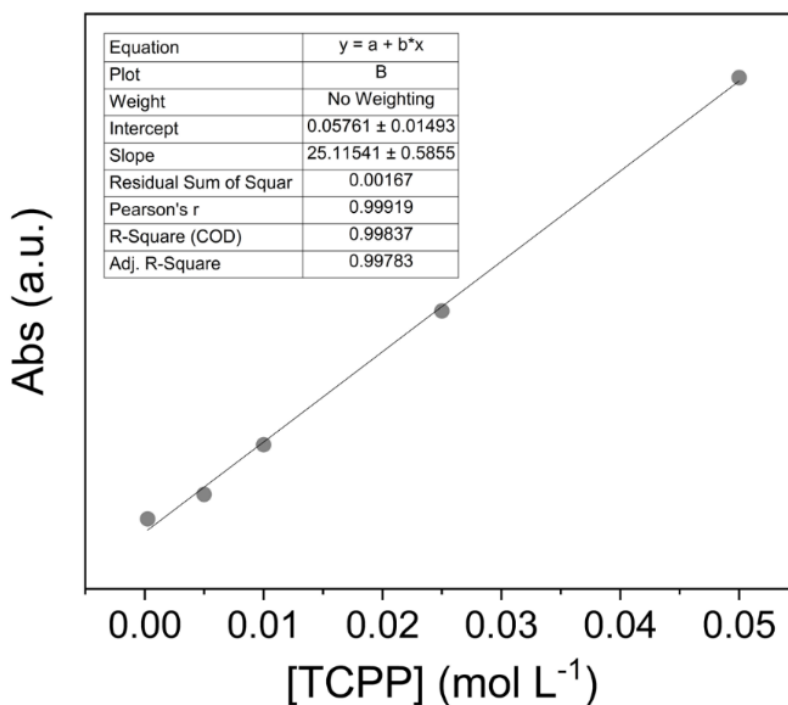

**Fig. S10** Calibration curve for the pulse input experiment using TCPP as pulse tracer.

Thus, the experiment was performed obtaining the curve of the concentration in function of time  $C(t)$ , which was thus converted into  $E(t)$  by dividing the curve  $C(t)$  with the integral of the same curve, as shown in Fig. S11 (a) and (b).

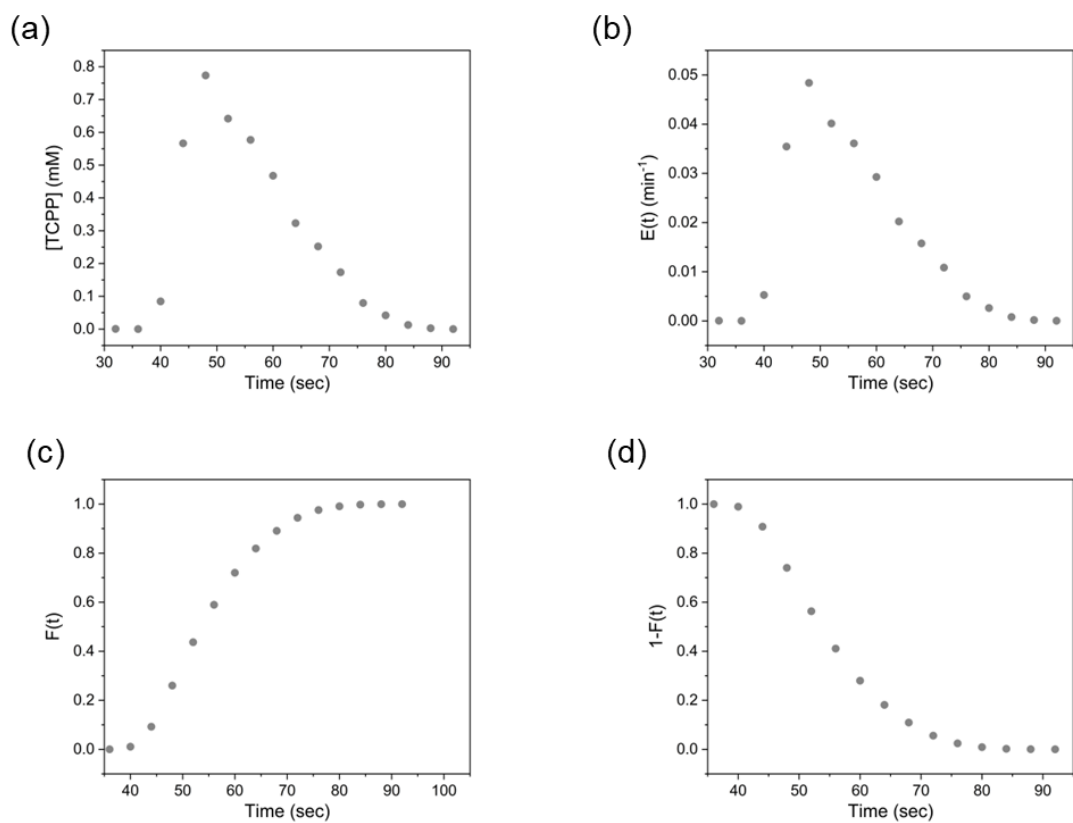

**Fig. S11** (a)  $C(t)$ , (b)  $E(t)$ , (c)  $F(t)$  and (d)  $1-F(t)$  curves of the pulse input experiment.

It was observed that ca. 60% of the solution passed through the reactor within the theoretical  $\tau$  (56 seconds), as also highlighted by the cumulative distribution function  $F(t)$  and by  $1-F(t)$  shown in Fig. S11 (c) and (d). Table S15 reports the data used for the calculations.

**Table S15** Experimental data of the pulse input experiment.

| time (sec) | [TCPP] (mM) | E (t)    | F(t)     | 1-F(t)   |
|------------|-------------|----------|----------|----------|
| 32         | 6.58E-04    | 4.11E-05 | 0        | 1        |
| 36         | 2.00E-04    | 1.25E-05 | 1.07E-04 | 0.99989  |
| 40         | 0.08436     | 0.00528  | 0.01068  | 0.98932  |
| 44         | 0.56662     | 0.03544  | 0.09211  | 0.90789  |
| 48         | 0.7737      | 0.04839  | 0.25977  | 0.74023  |
| 52         | 0.64191     | 0.04015  | 0.43684  | 0.56316  |
| 56         | 0.57688     | 0.03608  | 0.5893   | 0.4107   |
| 60         | 0.46774     | 0.02925  | 0.71997  | 0.28003  |
| 64         | 0.3231      | 0.02021  | 0.81889  | 0.18111  |
| 68         | 0.25215     | 0.01577  | 0.89085  | 0.10915  |
| 72         | 0.17322     | 0.01083  | 0.94406  | 0.05594  |
| 76         | 0.07958     | 0.00498  | 0.97568  | 0.02432  |
| 80         | 0.04186     | 0.00262  | 0.99087  | 0.00913  |
| 84         | 0.01269     | 7.93E-04 | 0.99769  | 0.00231  |
| 88         | 0.00275     | 1.72E-04 | 0.99962  | 3.80E-04 |
| 92         | 2.85E-04    | 1.78E-05 | 1        | 2.05E-07 |

## S8. US-assisted techniques

**Table S16** Experimental details for the optimization of the US-etching in c.f..

| Entry | US amplitude (%) | STY ( $\text{Kg m}^{-3} \text{ day}^{-1}$ ) | Size (nm) | Aspect ratio |
|-------|------------------|---------------------------------------------|-----------|--------------|
| 1     | 0                | 980±55                                      | 122±8     | 2.11±0.19    |
| 2     | 30               | 894±78                                      | 124±18    | 2.47±0.25    |
| 3     | 60               | 786±45                                      | 129±14    | 2.58±0.29    |
| 4     | 90               | 756±68                                      | 125±21    | 2.90±0.26    |

Reaction conditions: 408 K, L:M=1, L:Mod=0.036, [TCPP]=4.7 mM, flow rate 3 mL min<sup>-1</sup>, solvent DMF, 2.8 mL + 2.8 mL volume of the reactor(s).

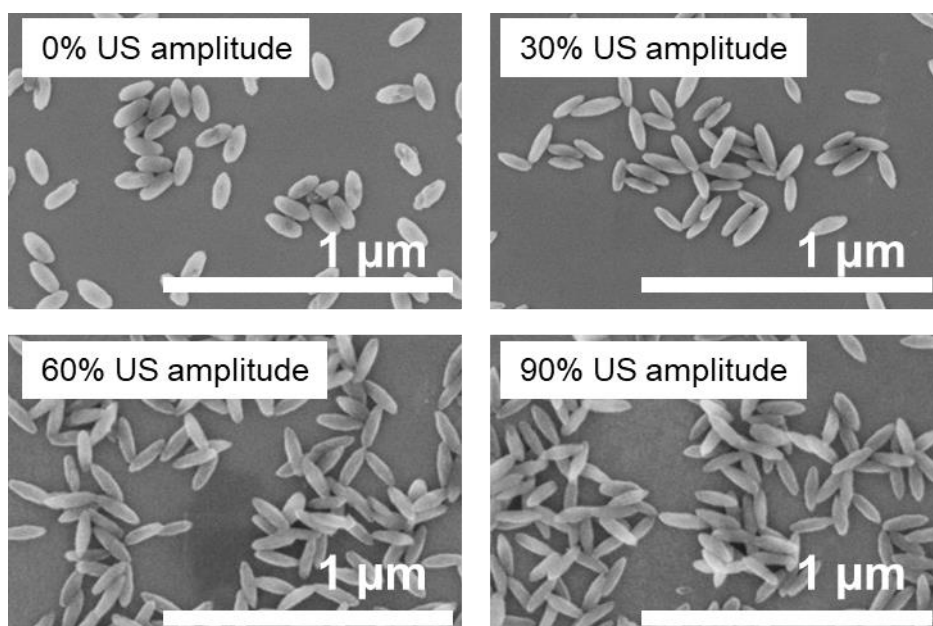

**Fig. S12** SEM images of the experiments for the optimization of the US-etching in c.f. Reaction conditions: 408 K, L:M=1, L:Mod=0.036, [TCPP]=4.7 mM, flow rate 3 mL min<sup>-1</sup>, solvent DMF.

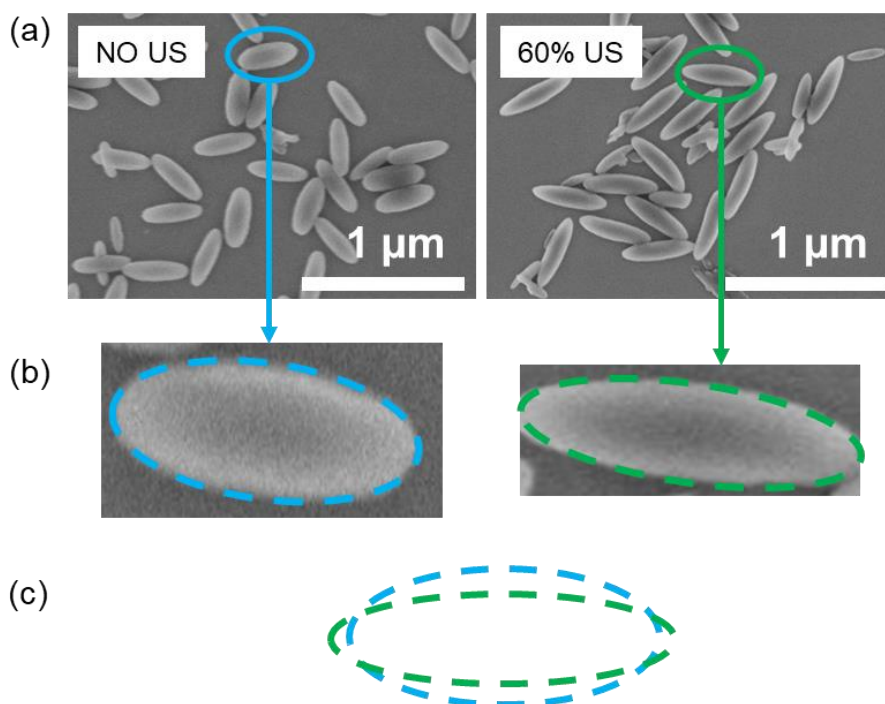

**Fig. S13** (a) SEM images, (b) details and (c) overlapping of the dimension of two selected particles for the study of the effect of US-etching in c.f. using larger PCN-222 particles. Reaction conditions: 408 K, L:M=1, L:Mod=0.036, [TCPP]=4.7 mM, flow rate 3 mL min<sup>-1</sup>, solvent DMF.

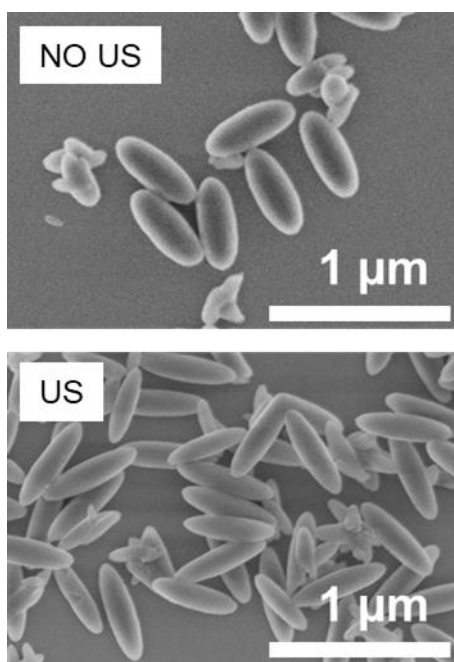

**Fig. S14** SEM images of the experiments for the study of the effect of US-etching in batch (using an US bath for 30 minutes). Reaction conditions for the synthesis of PCN-222: 393 K, 5 h, 22.5 mg TCPP (0.0284 mmol), 38 mg Zr<sub>6</sub> nodes (L:M=0.9), 8 mL DMF, 350 μL TFA (L:Mod= 0.006).



S9. DLS analysis of the samples PCN-222(0%US) and PCN-222(60%US)

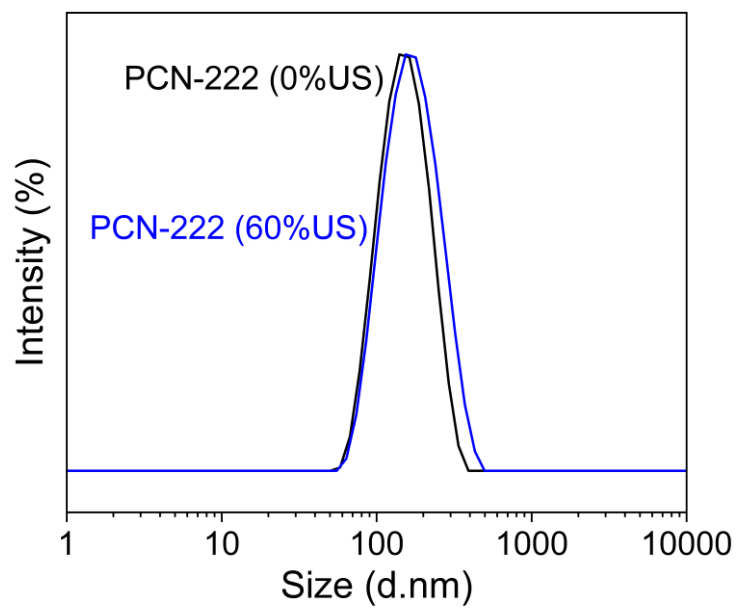

**Fig. S15** DLS curves of the samples PCN-222(0%US) and PCN-222(60%US). Hydrodynamic dimensions were  $154\pm 36$  nm and  $178\pm 42$  nm respectively. Reaction conditions: 408 K, L:M=1, L:Mod=0.036, [TCPP]=4.7 mM, flow rate  $3\text{ mL min}^{-1}$ , solvent DMF, 2.8 mL + 2.8 mL volume of the reactor.

### S10. Green approach of the c.f. synthesis

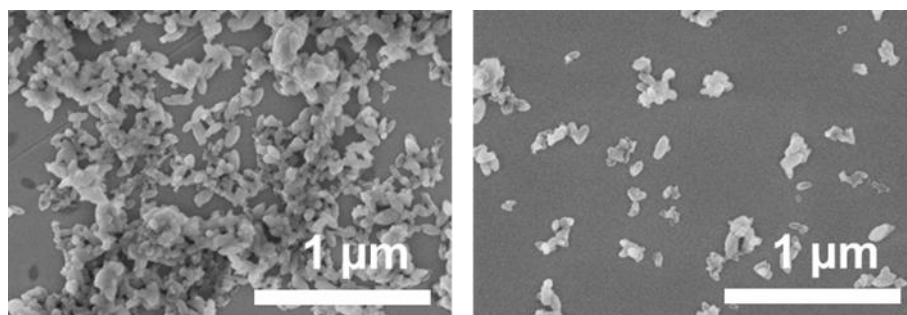

**Fig. S16** SEM images of the synthesis in c.f. using a mixture 1:1 cyclohexane:DMF as solvent. Reaction conditions: 408 K, L:M=1, L:Mod=0.036, [TCPP]=4.7 mM, flow rate 3 mL min<sup>-1</sup>.

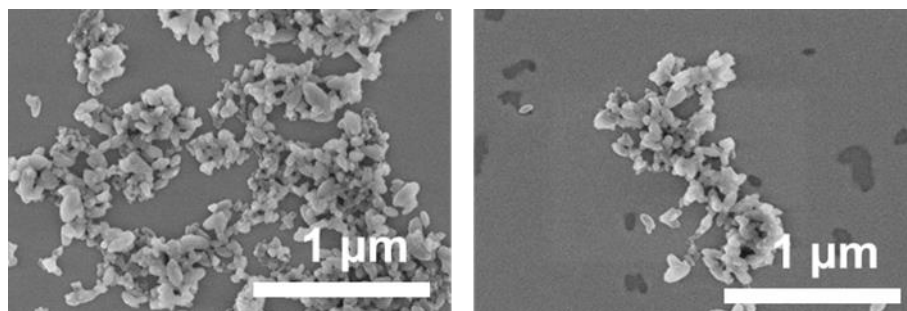

**Fig. S17** SEM images of the synthesis in c.f. using a mixture 1:1 anisole:DMF as solvent. Reaction conditions: 408 K, L:M=1, L:Mod=0.036, [TCPP]=4.7 mM, flow rate 3 mL min<sup>-1</sup>.

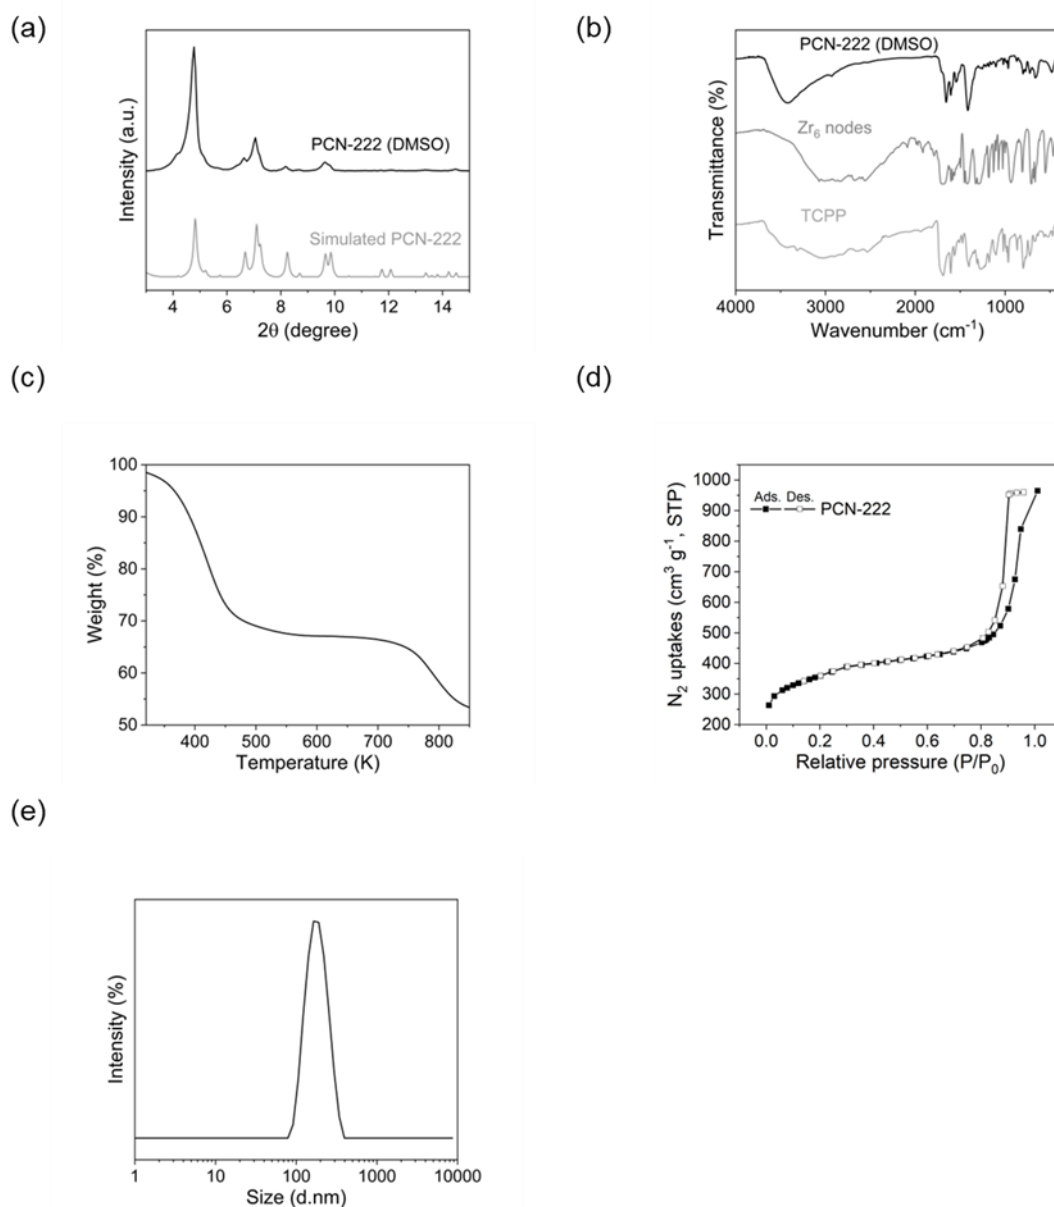

**Fig. S18** (a) PXRD patterns, (b) FTIR analysis, (c) details of TGA analysis (d)  $N_2$  absorption/desorption isotherm and (e) DLS curve of PCN-222 produced using DMSO as solvent. Reaction conditions: 408 K, L:M=1, L:Mod=0.036, [TCP]=4.7 mM, flow rate 3 mL min<sup>-1</sup>.

**Table S17** Experimental details for the optimization of the temperature using DMSO as solvent in c.f.

| Entry | Temperature (K) | STY (Kg m <sup>-3</sup> day <sup>-1</sup> ) | Size (nm) |
|-------|-----------------|---------------------------------------------|-----------|
| 1     | 403             | 956±18                                      | 238±76    |
| 2     | 413             | 1003±34                                     | 485±111   |
| 3     | 433             | 1065±66                                     | 521±103   |
| 4     | 423             | 1173±74                                     | 536±185   |

Reaction conditions: L:M=1, L:Mod=0.036, [TCP]=4.7 mM, flow rate 3 mL min<sup>-1</sup>, solvent DMSO.

**Table S18** Green metrics of the experiments of the optimization of the temperature of the reaction

| Entry | Temperature (K) | E-factor no solvents | RME(%)no solvents | E-factor with solvents |
|-------|-----------------|----------------------|-------------------|------------------------|
| 1     | 403             | 39.4                 | 2.5               | 2,355                  |
| 2     | 413             | 37.5                 | 2.6               | 2,245                  |
| 3     | 433             | 35.3                 | 2.8               | 2,114                  |
| 4     | 423             | 32.0                 | 3.0               | 1,919                  |

Reaction conditions: L:M=1, L:Mod=0.036, [TCPP]=4.7 mM, flow rate 3 mL min<sup>-1</sup>, solvent DMSO. When solvents were considered for E-factor calculations, a total of 3.15 mL of DMSO (for reaction and for washing) and 0.7 mL of EtOH were used for the volume of the reactor. Densities for DMSO and EtOH are 1.100 and 0.789 g mL<sup>-1</sup> respectively.

**Table S19** Experimental details for the optimization of acid modulator concentration using DMSO as solvent in c.f..

| Entry | L:Mod | STY (Kg m <sup>-3</sup> day <sup>-1</sup> ) | Size (nm) |
|-------|-------|---------------------------------------------|-----------|
| 1     | 0.054 | 1173±25                                     | 116±26    |
| 2     | 0.044 | 1110±18                                     | 331±95    |
| 3     | 0.036 | 941±35                                      | 503±121   |
| 4     | 0.015 | 679±14                                      | 1053±318  |

Reaction conditions: 423 K, L:M=1, [TCPP]=4.7 mM, flow rate 3 mL min<sup>-1</sup>, solvent DMSO.

**Table S20** Green metrics of the experiments for the optimization of acid modulator concentration using DMSO as solvent in c.f..

| Entry | L:Mod | E-factor no solvents | RME(%)no solvents | E-factor with solvents |
|-------|-------|----------------------|-------------------|------------------------|
| 1     | 0.054 | 25.4                 | 3.8               | 1,913                  |
| 2     | 0.044 | 30.1                 | 3.2               | 2,024                  |
| 3     | 0.036 | 40.1                 | 2.4               | 2,392                  |
| 4     | 0.015 | 103.3                | 1.0               | 3,363                  |

Reaction conditions: 423 K, L:M=1, [TCPP]=4.7 mM, flow rate 3 mL min<sup>-1</sup>, solvent DMSO. When solvents were considered for E-factor calculations, a total of 3.15 mL of DMSO (for reaction and for washing) and 0.7 mL of EtOH were used for the volume of the reactor. Densities for DMSO and EtOH are 1.100 and 0.789 g mL<sup>-1</sup> respectively.

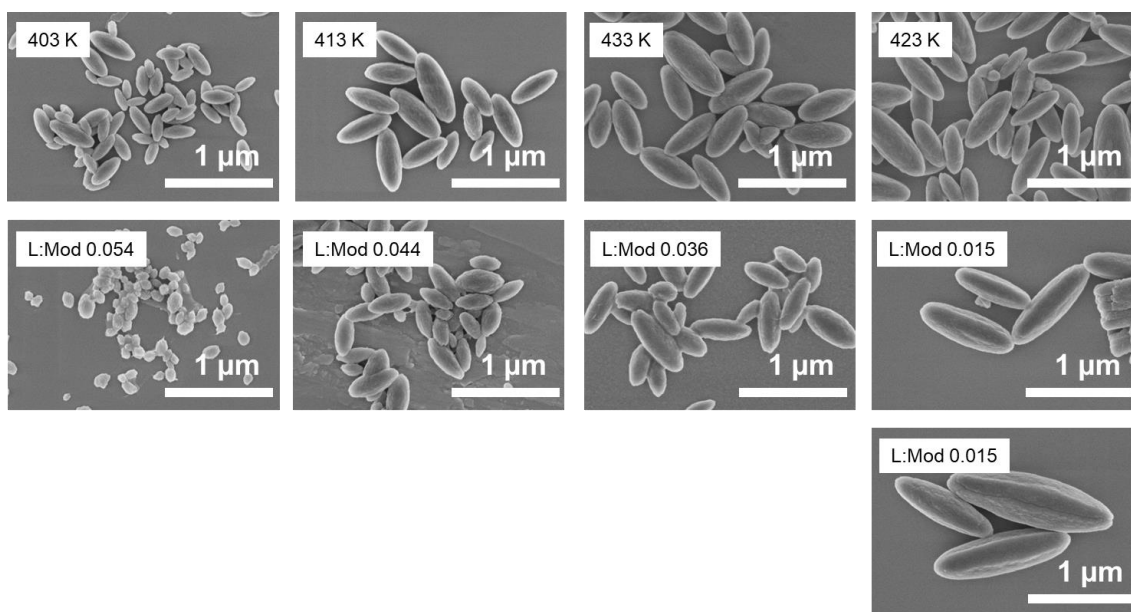

**Fig. S19** SEM images for the optimization of acid modulator concentration using DMSO as solvent in c.f..

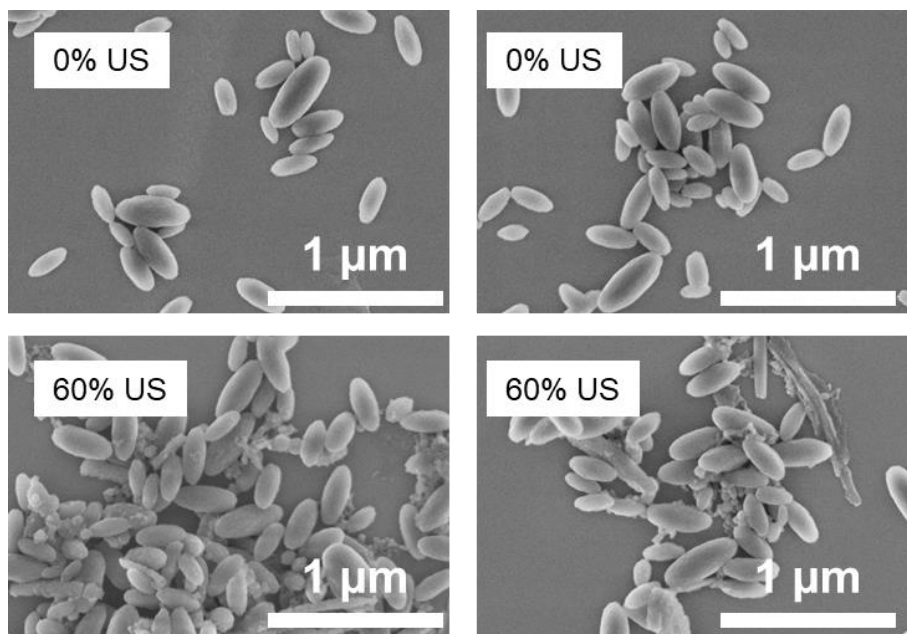

**Fig. S20** SEM images for the optimization of the US-etching in c.f. using DMSO as solvent. Reaction conditions: 408 K, L:M=1, L:Mod=0.036, [TCPP]=4.7 mM, flow rate 3 mL min<sup>-1</sup>.

### S11. Functionalization with S-GalNAc-PEG-sulfate ligand

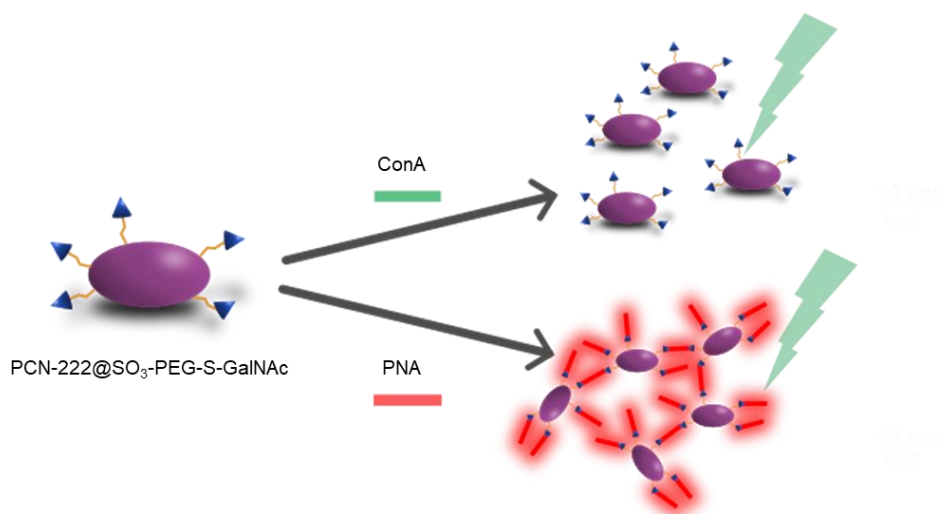

**Fig. S21** Scheme of the fluorescence microscopy experiment of selective interaction of the PCN@SO<sub>3</sub>-PEG-S-GalNAc with lectins.

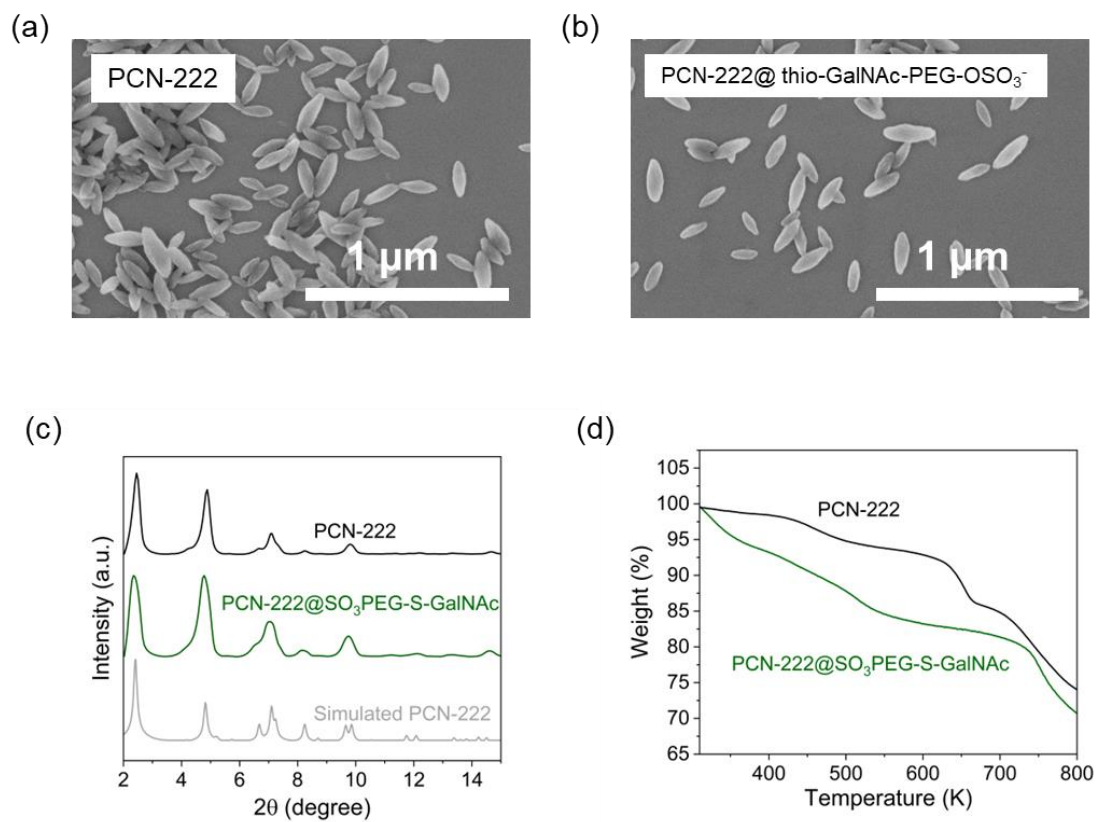

**Fig. S22** (a), (b) SEM images; (C) XRD patterns and (d) TGA curves of PCN-222 and PCN-222@ligand in c.f. Reaction conditions: 408 K, L:M=1, L:Mod=0.036, [TCPP]=4.7 mM, flow rate of the MOF 3 mL min<sup>-1</sup>, flow rate of the mixture of the ligand (in concentration 5 mg mL<sup>-1</sup>) 3 mL min<sup>-1</sup>, solvent DMF.

## S12. References

- 1 E. G. Rasmussen, J. Kramlich and I. V. Novosselov, *ACS Sustain Chem Eng*, 2020, **8**, 9680–9689.
- 2 S. Bagi, S. Yuan, S. Rojas-Buzo, Y. Shao-Horn and Y. Román-Leshkov, *Green Chem*, 2021, **23**, 9982–9991.
- 3 B. He, L. K. Macreadie, J. Gardiner, S. G. Telfer and M. R. Hill, *ACS Appl Mater Inter*, 2021, **13**, 54284–54293.
- 4 C. Avci-Camur, J. Troyano, J. Pérez-Carvajal, A. Legrand, D. Farrusseng, I. Imaz and D. Maspoch, *Green Chem*, 2018, **20**, 873–878.
- 5 L. Garzón-Tovar, M. Cano-Sarabia, A. Carné-Sánchez, C. Carbonell, I. Imaz and D. Maspoch, *React Chem Eng*, 2016, **1**, 533-539.
- 6 Y. Wang, L. Li, L. Yan, L. Cao, P. Dai, X. Gu and X. Zhao, *Chinese Chem Lett*, 2018, **6**, 849-853.
- 7 S. Bagi, A. M. Wright, J. Oppenheim, M. Dincă and Y. Román-Leshkov, *ACS Sustain Chem Eng*, 2021, **9**, 3996-4003.
- 8 F. Carraro, J. D. Williams, M. Linares-Moreau, C. Parise, W. Liang, H. Amenitsch, C. Doonan, C. O. Kappe and P. Falcaro, *Angew Chem Int Ed*, 2020, **59**, 8123-8127.
- 9 G. H. Albuquerque, R. C. Fitzmorris, M. Ahmadi, N. Wannemacher, P. K. Thallapally, B. P. McGrail and G. S. Herman, *CrystEngComm*, 2015, **17**, 5502-5510.
- 10 A. Laybourn, A. M. López-Fernández, I. Thomas-Hillman, J. Katrib, W. Lewis, C. Dodds, A. P. Harvey and S. W. Kingman, *Chem Eng J*, 2019, **359**, 170-177.
- 11 A. Polyzoidis, M. Schwarzer, S. Loebbecke and C. G. Piscopo, *Mater Lett*, 2017, **197**, 213-216.
- 12 B. He, M. M. Sadiq, M. P. Batten, K. Suzuki, M. Rubio-Martinez, J. Gardiner and M. R. Hill, *Chem-Eur J*, 2019, **25**, 13184-13188.
- 13 T. Bailey, M. Pinto, N. Hondow and K. J. Wu, *MethodsX*, 2021, **8**, 101246.
- 14 P. A. Bayliss, I. A. Ibarra, E. Pérez, S. Yang, C. C. Tang, M. Poliakoff and M. Schröder, *Green Chem*, 2014, **16**, 3796-3802.
- 15 F. Xue, J. Cao, X. Li, J. Feng, M. Tao and B. Xue, *J Mater Chem C*, 2021, **9**, 7568-7574.
- 16 H. Reinsch, S. Waitschat, S. M. Chavan, K. P. Lillerud and N. Stock, *Eur J Inorg Chem*, 2016, **27**, 4490-4498.
- 17 T. K. Vo, V. C. Nguyen, D. T. Quang, B. J. Park and J. Kim, *Micropor Mesopor Mater*, 2021, **312**, 110746.
- 18 T. K. Vo, V. N. Le, D. T. Quang, M. Song, D. Kim and J. Kim, *Micropor Mesopor Mater*, 2020, **306**, 110405.
- 19 E. G. Rasmussen, J. Kramlich and I. V. Novosselov, *Chem Eng J*, 2022, **450**, 138053.
- 20 T. Didriksen, A. I. Spjelkavik and R. Blom, *J Flow Chem*, 2017, **7**, 13-17.
- 21 Y. Wang, L. Li, L. Yan, X. Gu, P. Dai, D. Liu, J. G. Bell, G. Zhao, X. Zhao and K. M. Thomas, *Chem Mater*, 2018, **30**, 3048-3059.
- 22 V. N. Le, H. T. Kwon, T. K. Vo, J. H. Kim, W. S. Kim and J. Kim, *Mater Chem Phys*, 2020, **253**, 123278.
- 23 L. Paseta, B. Seoane, D. Julve, V. Sebastián, C. Téllez and J. Coronas, *ACS Appl Mater Interfaces*, 2013, **5**, 9405-9410.
- 24 W. Yu, H. Chen, H. Wu, P. Lin, H. Xu, Q. Xie, K. Shi, G. Xie and Y. Chen, *J Alloys Compd*, **890**, 161860.
- 25 M. Zhang, Z. Yu, Z. Sun, A. Wang, J. Zhang, Y. Y. Liu and Y. Wang, *Micropor Mesopor Mater*, 2021, **327**, 111423.



**S13. Annex:  $^1\text{H}$ -NMR and  $^{13}\text{C}$ -NMR spectra**

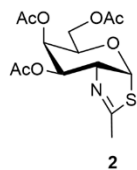

**$^1\text{H NMR}$  (400MHz,  $\text{CDCl}_3$ ):**  $\delta$  6.27 (d, 1H,  $J_{1,2}=6.31\text{Hz}$ , H-1), 5.54 (t, 1H,  $J_{3,4}=J_{4,5}=3.32\text{Hz}$ , H-4), 5.23 (dd, 1H,  $J_{3,2}=8.00\text{Hz}$ ,  $J_{3,4}=3.40\text{Hz}$ , H-3), 4.41 (t, 1H,  $J_{2,1}=J_{2,3}=7.15\text{Hz}$ , H-2), 4.34-4.29 (m, 1H, H-5), 4.28-4.21 (m, 1H, H-6a), 4.15-4.09 (m, 1H, H-6b), 2.29 (d, 3H,  $J=1.61\text{Hz}$ , C- $\text{CH}_3$ ), 2.15 (s, 3H, -COO- $\text{CH}_3$ ), 2.11 (s, 3H, -COO- $\text{CH}_3$ ), 2.08 (s, 3H, -COO- $\text{CH}_3$ ).

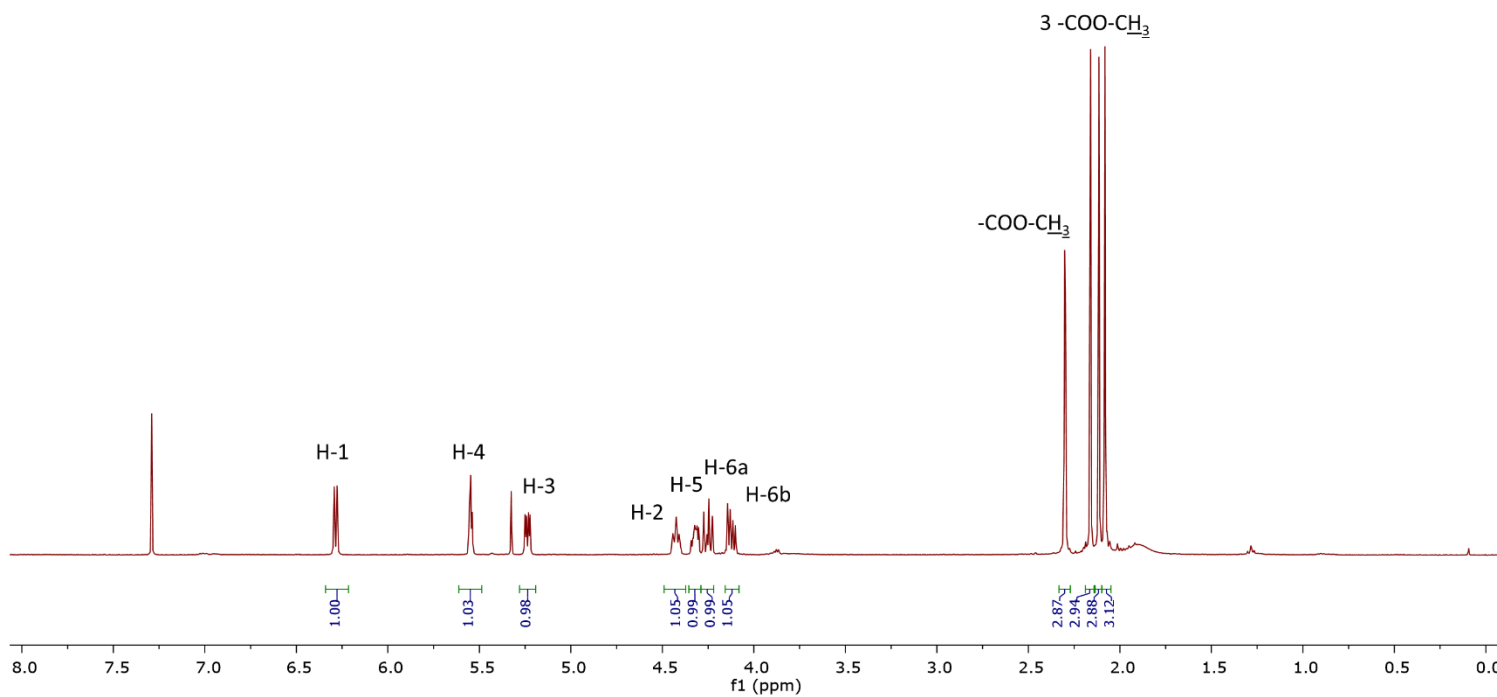

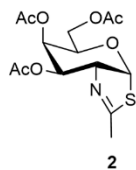

$^{13}\text{C}$  NMR (100MHz,  $\text{CDCl}_3$ ):  $\delta$  170.5 (CO), 170.2 (CO), 169.8 (CO), 168,5 (=C-), 89.0 (C1), 74.5 (C2), 70.6 (C5), 70.5(C3), 66.3 (C4), 60.9 (C6), 21.4 (C- $\text{CH}_3$ ), 20.9 (-COO- $\text{CH}_3$ ), 20.7 (-COO- $\text{CH}_3$ ), 20.6 (-COO- $\text{CH}_3$ ).

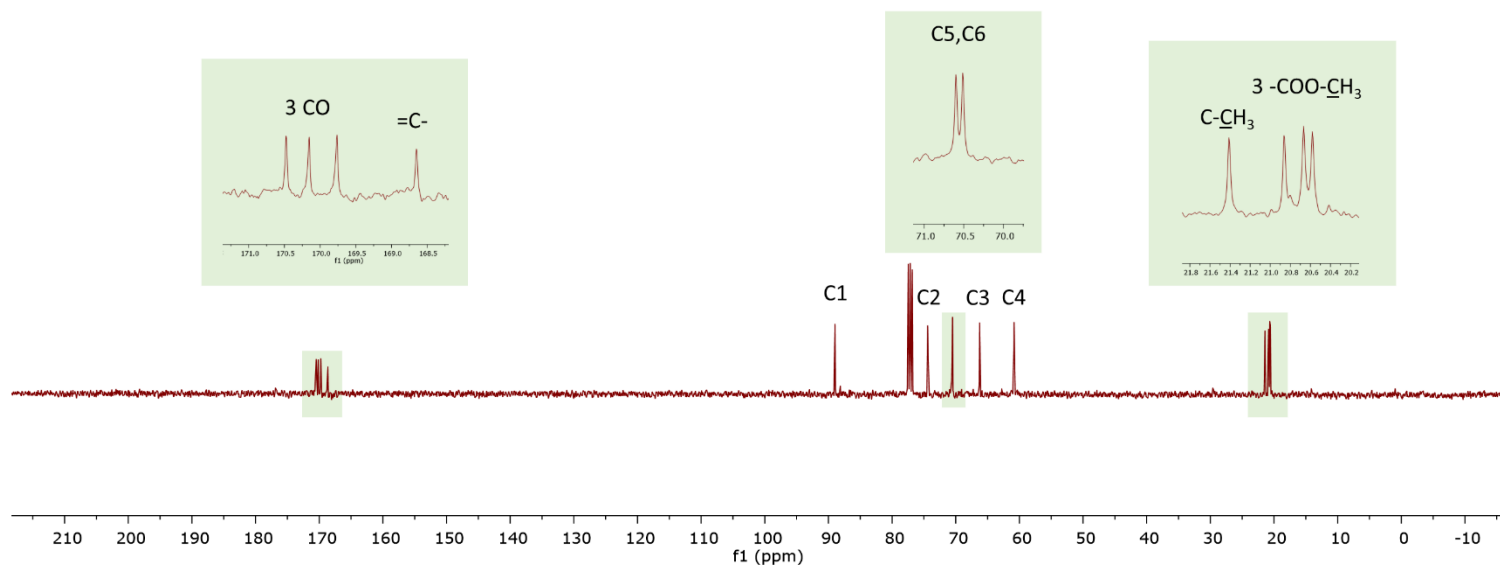

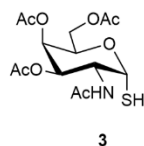

**<sup>1</sup>H NMR (400MHz, CDCl<sub>3</sub>):** δ 5.58 (t, 1H,  $J_{1,2}=J_{1,5H}=5.80\text{Hz}$ , H-1), 5.73 (d, 1H,  $J_{NH,2}=7.68\text{Hz}$ , NH-COOH-CH<sub>3</sub>), 5.41 (d, 1H,  $J_{4,3}=2.40\text{Hz}$ , H-4), 5.09 (dd, 1H,  $J_{3,2}=11.80\text{Hz}$ ,  $J_{3,4}=3.20\text{Hz}$ , H-3), 4.81-4.70 (m, 1H, H-2), 4.53 (t, 1H,  $J_{5,6a}=J_{5,6b}=48\text{Hz}$ , H-5), 4.22-4.00 (m, 2H, H-6), 2.17 (s, 3H, -COO-CH<sub>3</sub>), 2.06 (s, 3H, -COO-CH<sub>3</sub>), 2.03 (s, 3H, -COO-CH<sub>3</sub>), 2.00 (s, 3H, -COO-CH<sub>3</sub>), 1.96 (d,  $J=6.6\text{Hz}$ , -SH).

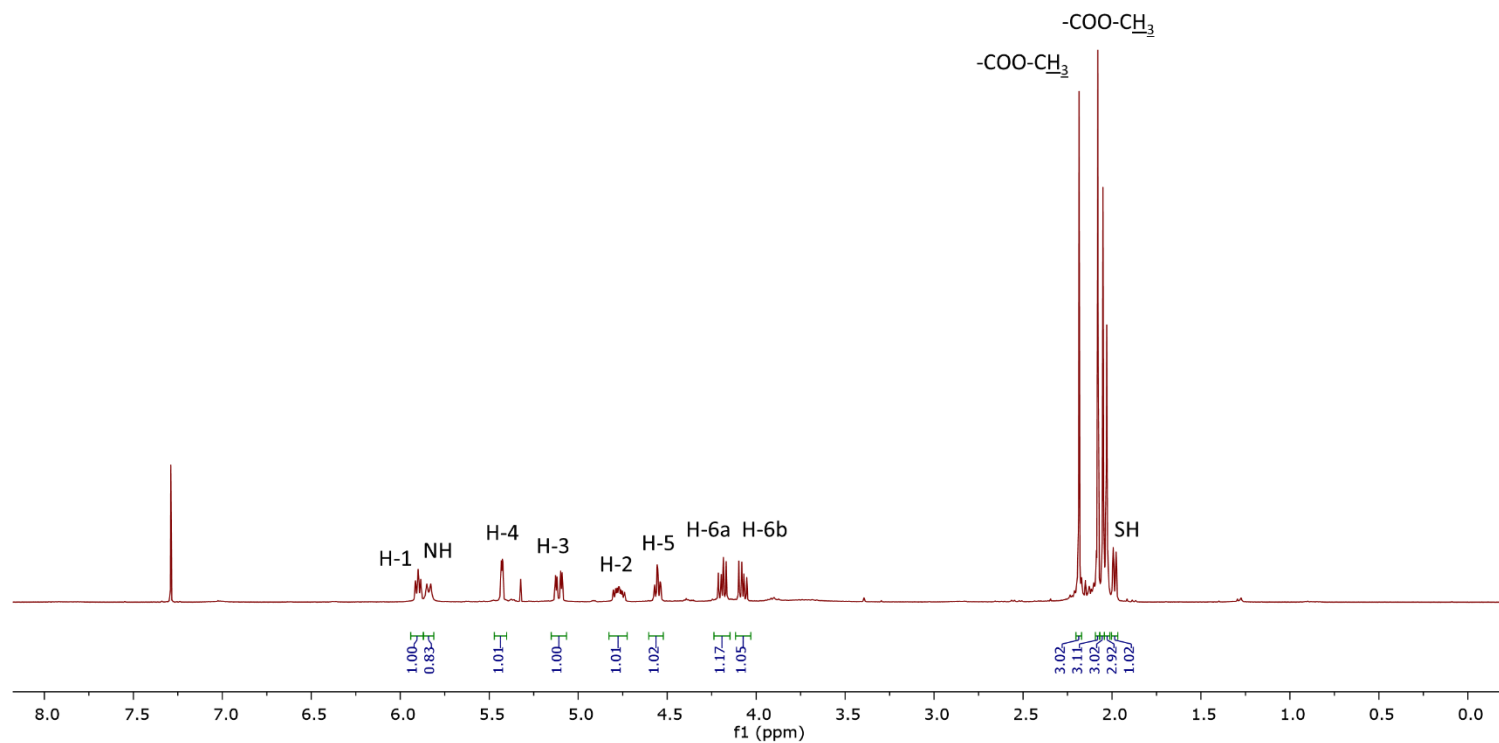

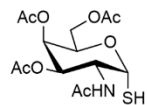

3

$^{13}\text{C}$  NMR (100MHz,  $\text{CDCl}_3$ ):  $\delta$  171.1 (CO), 170.8 (CO), 170.5 (CO), 170.2 (CO), 79.6 (C1), 67.8 (C5), 67.7 (C3), 67.1 (C6), 61.6 (C4), 48.4 (C2), 20.8 (NHCO $\text{CH}_3$ ), 20.7 (-COO $\text{CH}_3$ ), 20.7 (-COO $\text{CH}_3$ ), 20.7 (-COO $\text{CH}_3$ ).

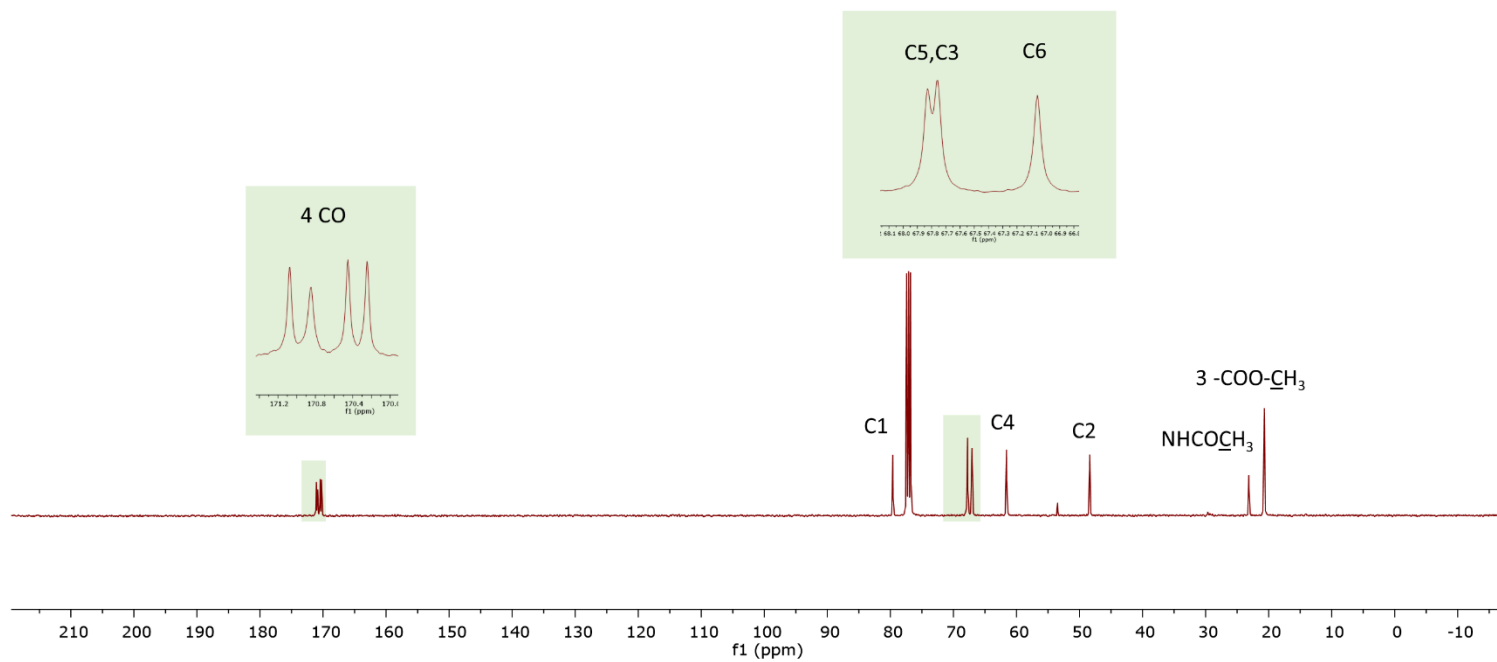

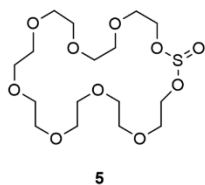

$^1\text{H NMR}$  (500MHz,  $\text{CDCl}_3$ ):  $\delta$  4.25-4.10 (m, 4H, 2  $-\text{CH}_2-\text{OSO}_2-\text{O}-$ ), 3.79-3.71 (m, 4H, 2  $-\text{CH}_2-\text{CH}_2-\text{OSO}_2-\text{O}-$ ), 3.70-3.61 (m, 24H, 12  $\text{OCH}_2$ ).

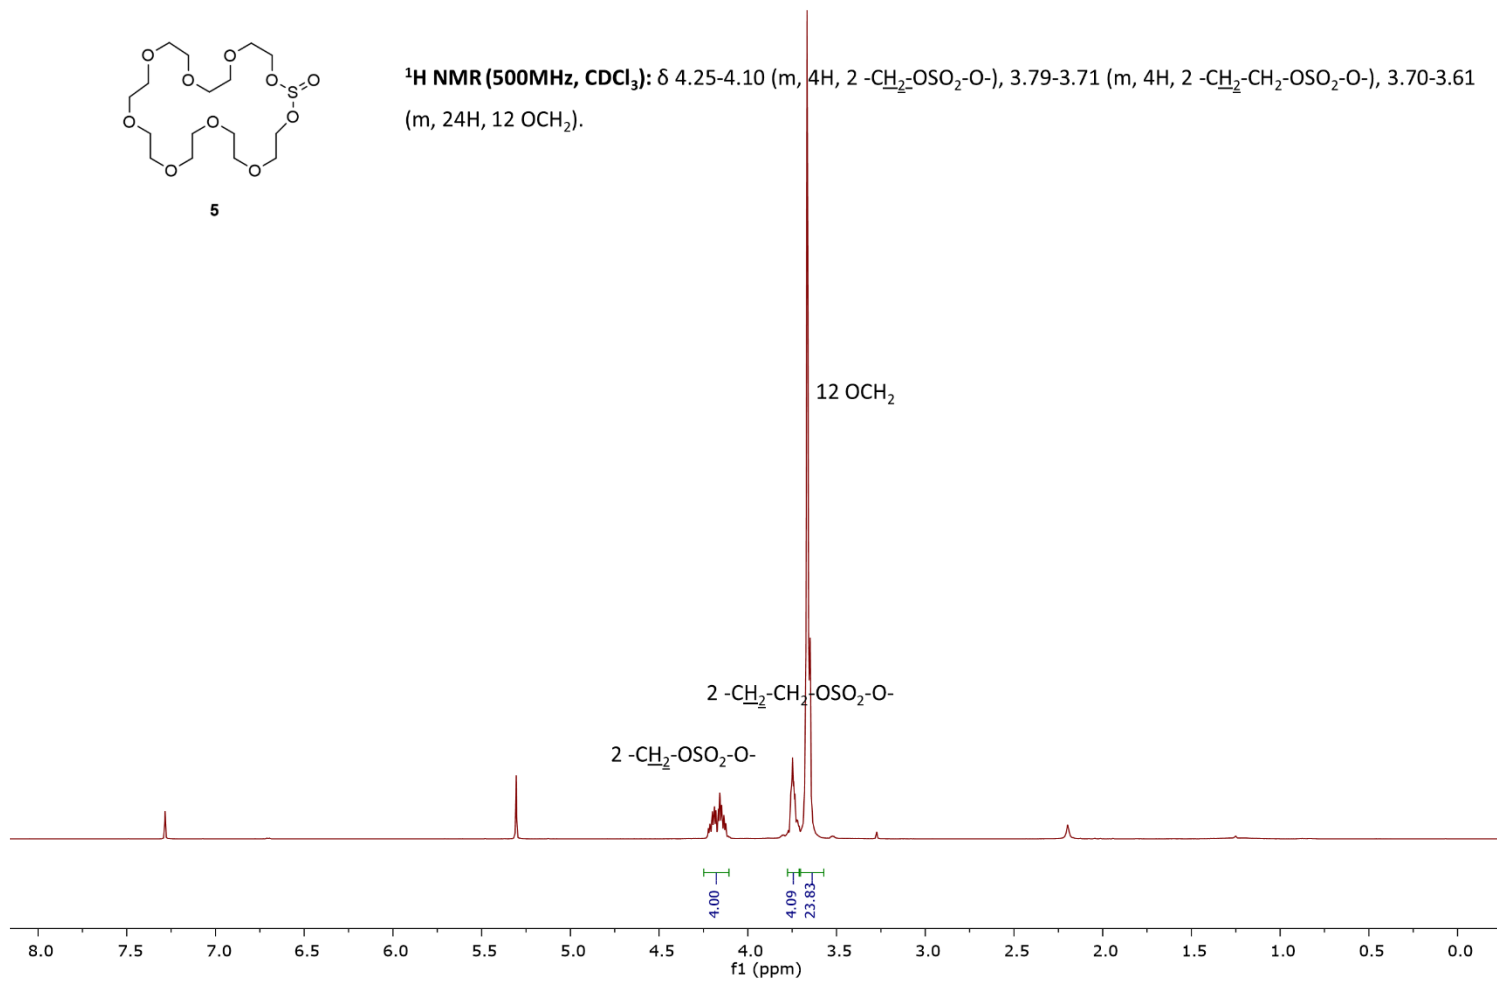

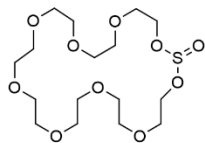

5

$^{13}\text{C}$  NMR (125MHz,  $\text{CDCl}_3$ ):  $\delta$  70.7 (6  $-\text{CH}_2\text{O}-$ ), 70.6 (6  $-\text{CH}_2\text{O}-$ ), 69.5 (2  $-\text{CH}_2-\text{CH}_2-\text{OSO}_2-\text{O}-$ ), 61.5 (2  $-\text{CH}_2-\text{OSO}_2-\text{O}-$ ).

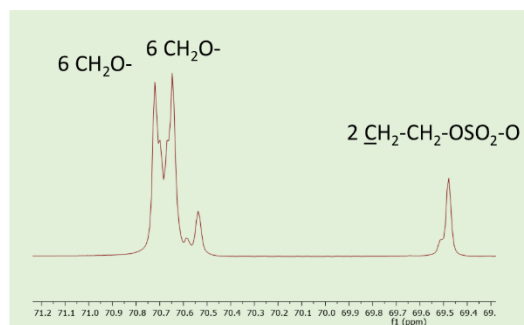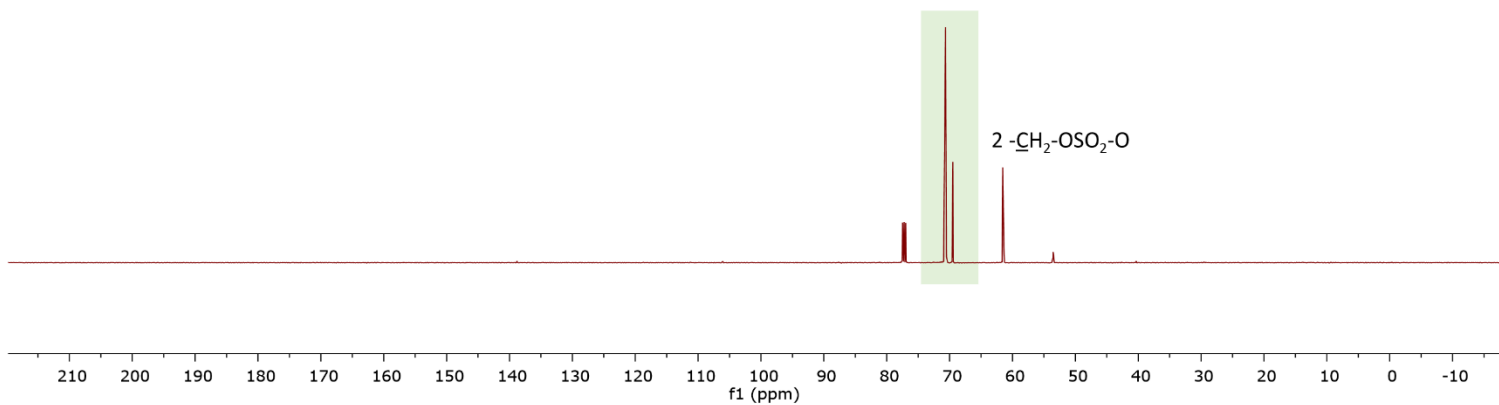

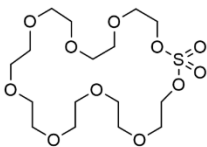

6

$^1\text{H NMR}$  (500MHz,  $\text{CDCl}_3$ ):  $\delta$  4.25 (t, 4H,  $J=4.61\text{Hz}$ , 2  $-\text{CH}_2-\text{OSO}_2-\text{O}-$ ), 3.62 (t, 4H,  $J=4.47\text{Hz}$ , 2  $-\text{CH}_2-\text{CH}_2-\text{OSO}_2-\text{O}-$ ), 3.52-3.36 (m, 24H, 12  $\text{OCH}_2$ ).

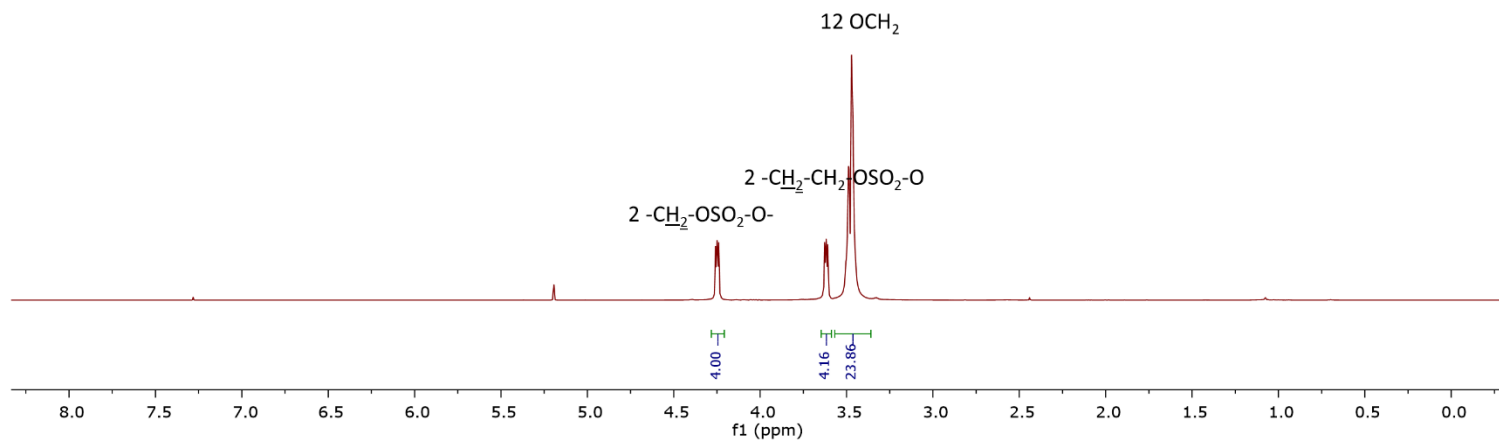





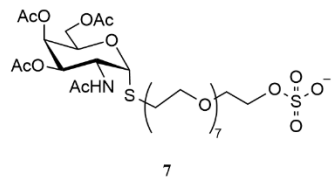

**<sup>1</sup>H NMR (500MHz, CDCl<sub>3</sub>):** δ 6.23 (d, 1H,  $J_{\text{NH},2}$ =8.23Hz, NH-COOH-CH<sub>3</sub>), 5.62 (d, 1H,  $J_{1,2}$ =5.24Hz, H-1), 5.42 (s, 1H, H-4), 5.07 (dd, 1H,  $J_{3,2}$ =11.70Hz,  $J_{3,4}$ =2.84Hz, H-3), 4.78-4.71 (m, 1H, H-2), 4.56 (t, 1H,  $J_{5,6a}$ = $J_{5,6b}$ =6.40Hz, H-5), 4.23 (t, 2H,  $J$ =3.83Hz, CH<sub>2</sub>-OSO<sub>3</sub><sup>-</sup>), 4.17-4.11 (m, 1H, H-6a), 4.11-4.05 (m, 1H, H-6b), 3.77-3.47 (m, 28H, 14 OCH<sub>2</sub>), 2.91-2.73 (m, 2H, S-CH<sub>2</sub>-CH<sub>2</sub>-), 2.16 (s, 3H, -COO-CH<sub>3</sub>), 2.06 (s, 3H, -COO-CH<sub>3</sub>), 2.01 (s, 3H, -COO-CH<sub>3</sub>), 2.00 (s, 3H, -COO-CH<sub>3</sub>).

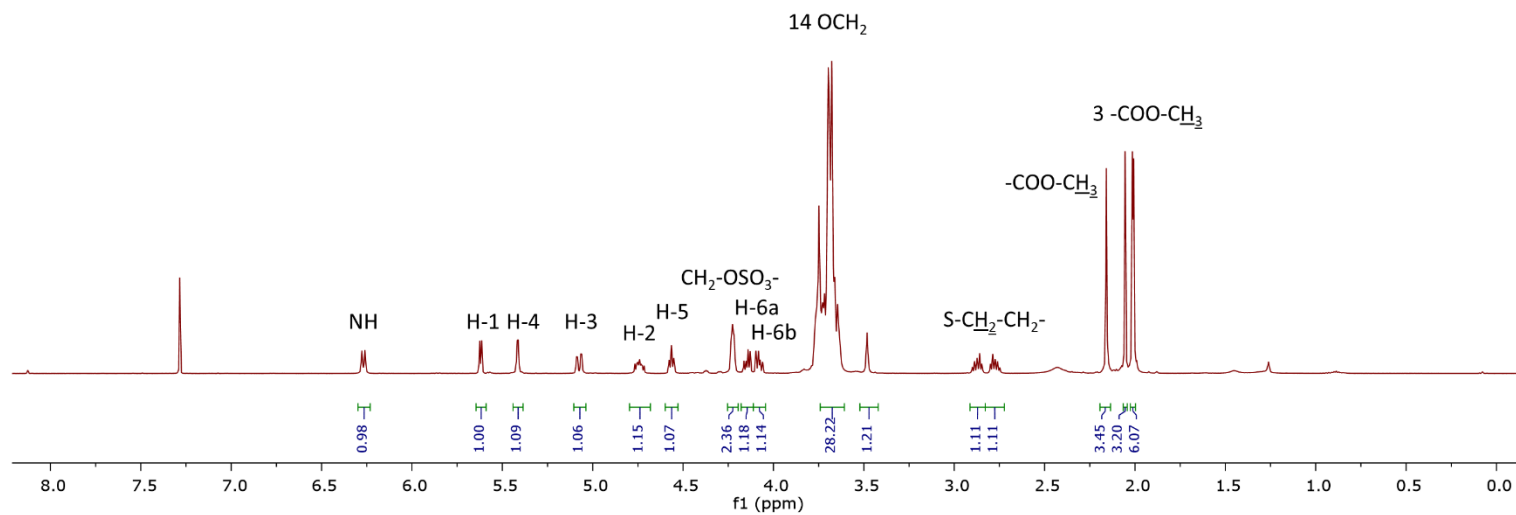

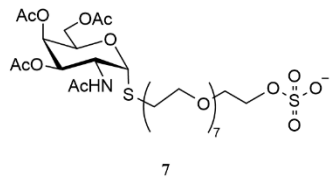

**<sup>13</sup>C NMR (125MHz, CDCl<sub>3</sub>):** δ 171.0 (CO), 170.7 (CO), 170.4 (CO), 170.3 (CO), 84.9 (C1), 70.3 (-CH<sub>2</sub>-), 70.1 (-CH<sub>2</sub>-), 70.0 (-CH<sub>2</sub>-), 69.9 (-CH<sub>2</sub>-), 69.9 (-CH<sub>2</sub>-), 69.7 (-CH<sub>2</sub>-), 69.6 (-CH<sub>2</sub>-), 69.6 (-CH<sub>2</sub>-), 69.6 (-CH<sub>2</sub>-), 69.5 (-CH<sub>2</sub>-), 69.5 (-CH<sub>2</sub>-), 69.4 (-CH<sub>2</sub>-), 69.3 (-CH<sub>2</sub>-), 68.4 (C3), 67.3 (C4), 67.1 (C5), 66.4 (-CH<sub>2</sub>-), 61.2 (C6), 48.3 (C2), 30.2 (-CH<sub>2</sub>-), 23.2 (CH<sub>3</sub>), 20.8 (CH<sub>3</sub>), 20.7 (CH<sub>3</sub>), 20.7 (CH<sub>3</sub>).

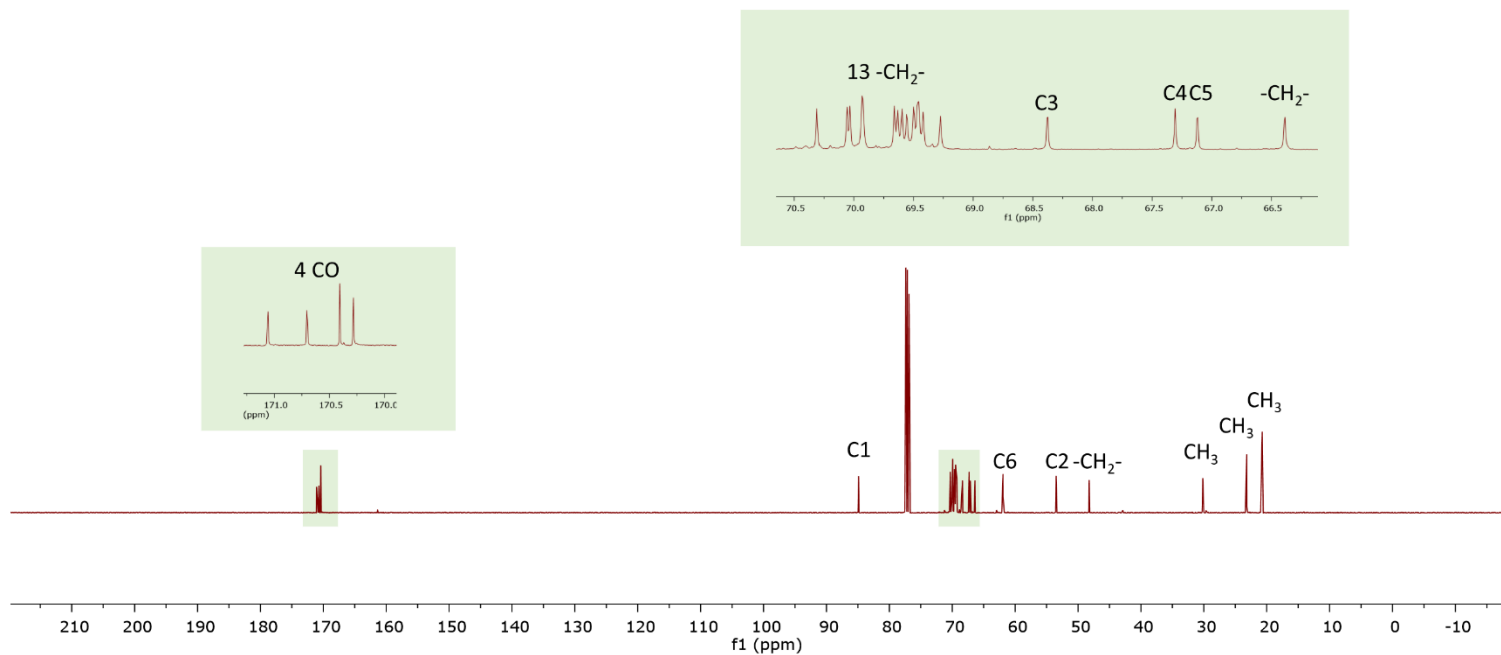

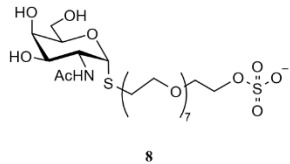

**$^1\text{H NMR}$  (500MHz, MeOD):**  $\delta$  5.63 (d, 1H,  $J_{1,2}=5.39\text{Hz}$ , H-1), 4.45-4.39 (m, 1H, H-2), 4.22-4.13 (m, 3H, H-5,  $\text{SO}_4\text{-CH}_2\text{-}$ ), 3.93 (d, 1H,  $J_{4,3}=3.29\text{Hz}$ , H-4), 3.80-3.63 (m, 31H, H-6, H-3, 14  $\text{OCH}_2$ ), 2.92-2.68 (m, 2H,  $\text{S-CH}_2\text{-CH}_2\text{-}$ ), 2.00 (s, 3H,  $\text{-COO-CH}_3$ ).

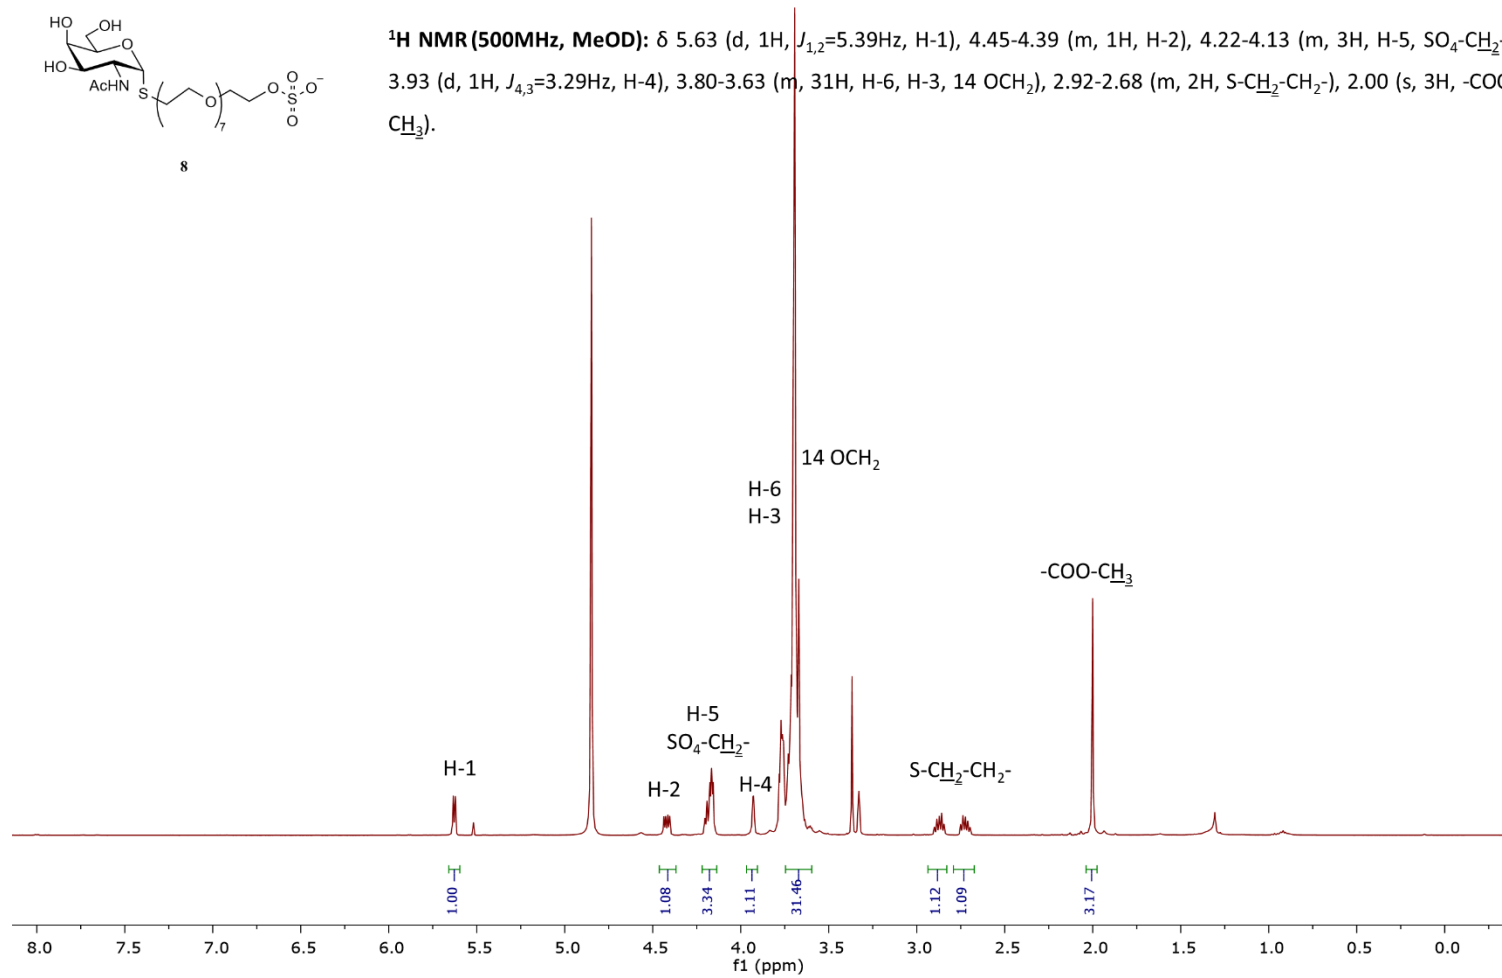

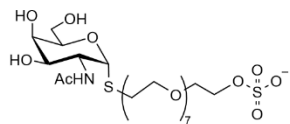

8

**<sup>13</sup>C NMR (125MHz, MeOD):**  $\delta$  172.5 (CO), 84.3 (C1), 71.6 (-CH<sub>2</sub>-OSO<sub>3</sub><sup>-</sup>), 70.4 (-CH<sub>2</sub>-), 69.7 (-CH<sub>2</sub>-), 69.7 (-CH<sub>2</sub>-), 69.6 (-CH<sub>2</sub>-), 69.6 (-CH<sub>2</sub>-), 69.6 (-CH<sub>2</sub>-), 69.5 (-CH<sub>2</sub>-), 69.5 (-CH<sub>2</sub>-), 69.5 (-CH<sub>2</sub>-), 69.5 (-CH<sub>2</sub>-), 69.4 (-CH<sub>2</sub>-), 69.4 (-CH<sub>2</sub>-), 69.4 (-CH<sub>2</sub>-), 69.3 (-CH<sub>2</sub>-), 68.9 (C4), 67.9 (C3), 66.8 (C5), 61.4 (C6), 50.5 (C2), 29.2 (-S-CH<sub>2</sub>-), 21.3 (CH<sub>3</sub>).

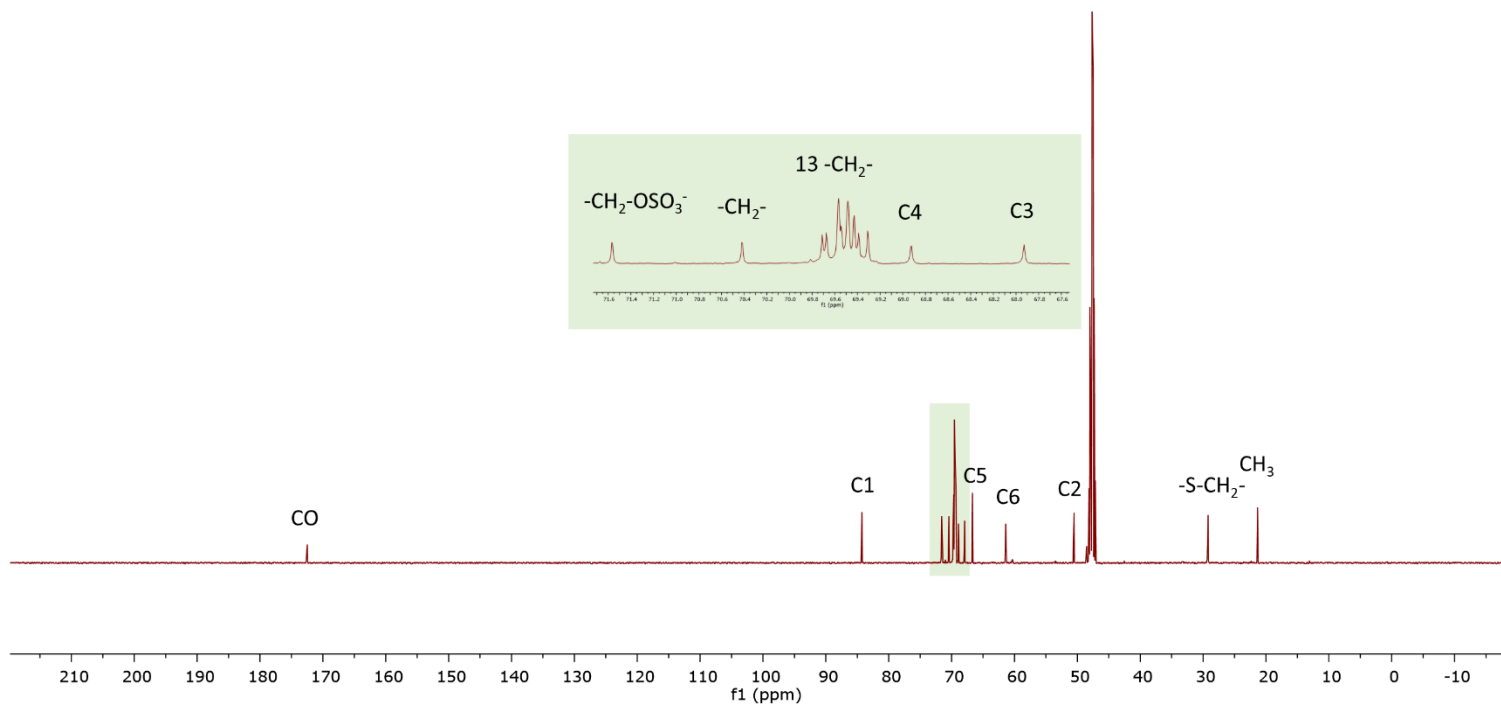

Supplement: d3gc02774k1.pdf [file d3gc02774k1.pdf]
